# Supplementary material for: High-Content RNAi Phenotypic Screening Unveils the Involvement of Human Ubiquitin-Related Enzymes in Late Cytokinesis
Source: MDPI journal article supplement (doi:10.3390/cells11233862), 2022-11-30
Supplement: s1 [file s1]

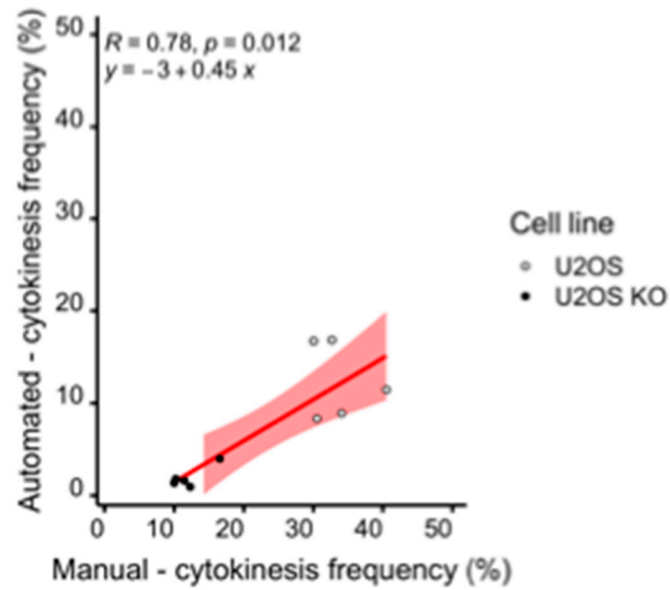

**Supplementary Figure S1.** Performance of the bioimage analysis tool in WT and *CEP55* KO U2OS cells. The frequencies of cytokinetic bridges from a blind manual detection of intercellular bridges were plotted against those obtained automatically by the program. The dots represent 10 experimental conditions – either WT or *CEP55* KO cells – from five different experiments. The correlation between the results of the two methods was appreciated by a Spearman correlation test.
