# Supplementary material for: High-Content RNAi Phenotypic Screening Unveils the Involvement of Human Ubiquitin-Related Enzymes in Late Cytokinesis
Source: MDPI journal article supplement (doi:10.3390/cells11233862), 2022-11-30
Supplement: s1 [file s1]

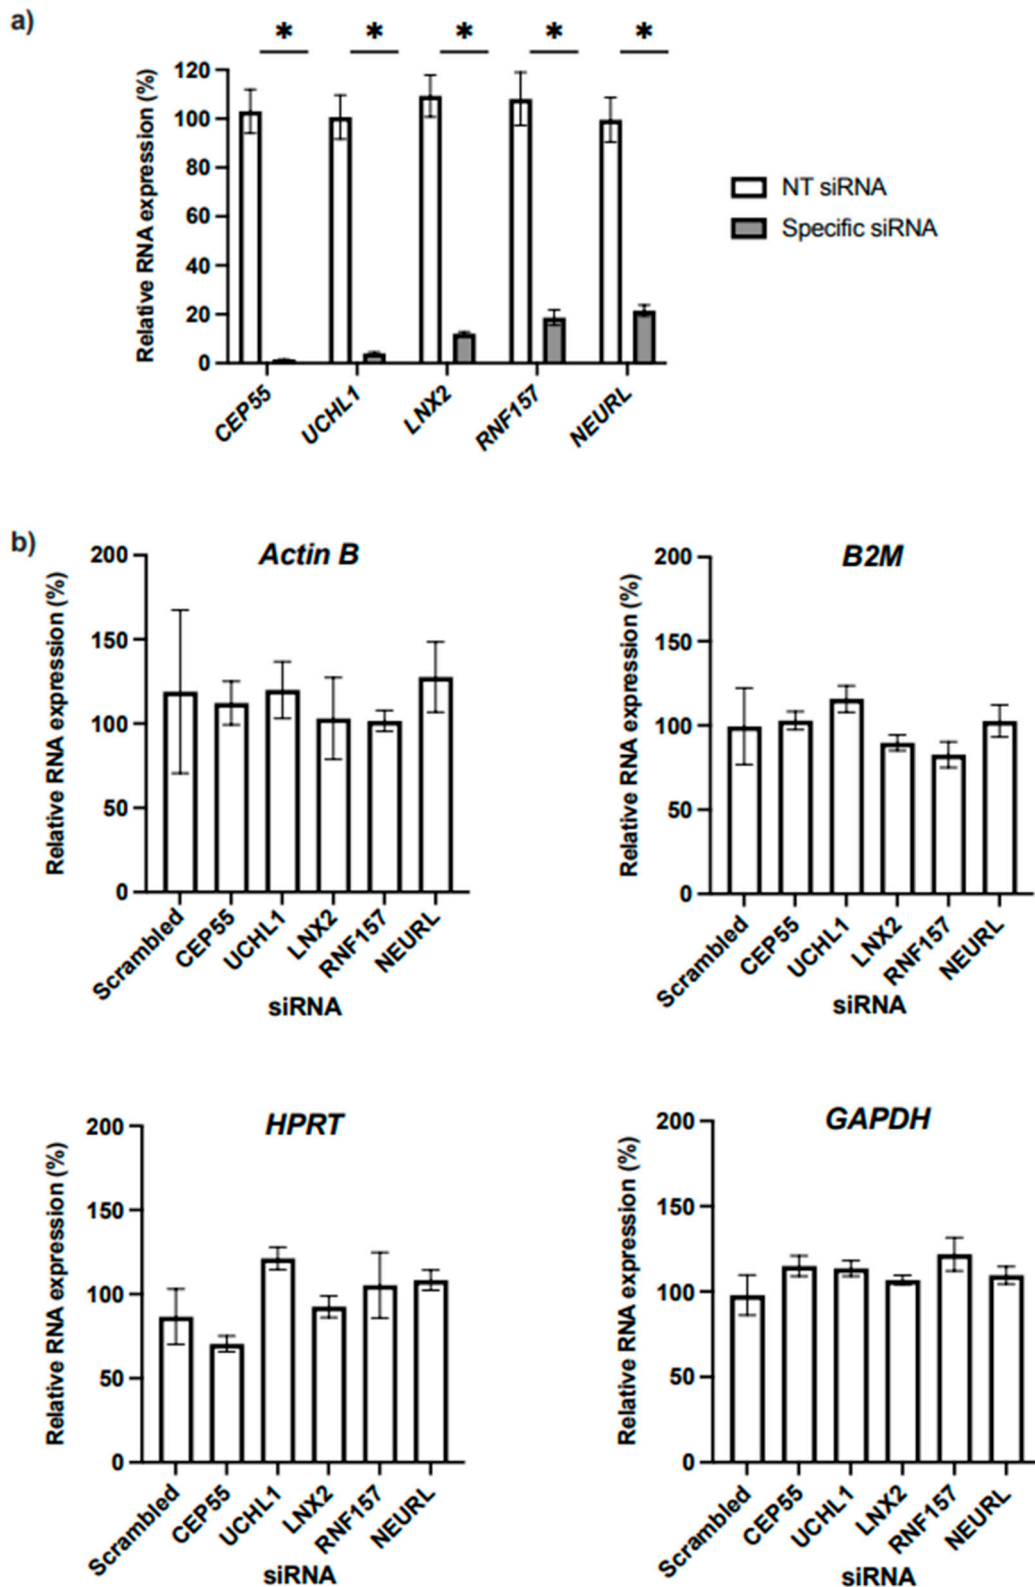

**Supplementary Figure S3.** Specific siRNA knock-down of *cep55* and candidate genes. HeLa cells were transfected with 25 nM non-targeting scrambled or gene-specific siRNA. 48 hours after transfection, total RNA was extracted, and gene expression was measured by RT-qPCR. The number of transcripts was normalised to the expression of the housekeeping gene *ppia*. (a) The relative expression of *cep55*, *uchl1*, *lnx2*, *rnf157* and *neurl* shows the significance of the respective downregulation. (b) As an indication of specificity, none of the other assessed genes were downregulated after transfection with a *cep55*- or candidate gene-specific siRNA. Shown is the mean  $\pm$  SD from four replicates per condition. Wilcoxon-Mann-Whitney tests compare the distributions of the replicates, where the scrambled siRNA condition is the reference. \*  $p < 0.05$ .
