# Supplementary material for: High-Content RNAi Phenotypic Screening Unveils the Involvement of Human Ubiquitin-Related Enzymes in Late Cytokinesis
Source: Cells. 2022 Nov 30;11(23):3862. doi: 10.3390/cells11233862 (PMC9737832; doi:10.3390/cells11233862)
Supplement: Supplementary file 1 [file cells-11-03862-s001.zip]

Archive with 4 entries (4 files):
- Supplementary Figure S1.pdf
- Supplementary Figure S2.pdf
- Supplementary Figure S3.pdf
- Supplementary_Table_S1_Screening_data.xlsx
