# Supplementary material for: High-Content RNAi Phenotypic Screening Unveils the Involvement of Human Ubiquitin-Related Enzymes in Late Cytokinesis
Source: Cells. 2022 Nov 30;11(23):3862. doi: 10.3390/cells11233862 (PMC9737832; doi:10.3390/cells11233862)
Supplement: Supplementary file 1 [file cells-11-03862-s001.zip › Supplementary_Table_S1_Screening_data.xlsx]

## Sheet: Feuil1
Index	Bank - plate	Bank - well	Gene symbol	GENE ID	GI number	Gene accession	Screening plate	Screening well	Nb. cells	Nb. cytokinesis	Freq. Cytokinesis	Z-score - freq. Cytokinesis
1	Plate 3 Duplex 1	B03	TRIM72	493829	142378442	NM_001008274	Plate1	B02	187	9	5.05618	-0.370634
2	Plate 3 Duplex 1	C03	RNF121	55298	37588864	NM_194452	Plate1	B03	221	16	7.80488	0.61056
3	Plate 3 Duplex 1	C05	KRTAP5-9	3846	123702037	NM_005553	Plate1	B04	128	6	4.91803	-0.419948
4	Plate 3 Duplex 1	C07	RNF19B	127544	23503262	NM_153341	Plate1	B05	192	9	4.91803	-0.419948
5	Plate 3 Duplex 1	F04	DPF2	5977	21536317	NM_006268	Plate1	B06	167	11	7.05128	0.341551
6	Plate 3 Duplex 1	F06	BAZ1B	9031	115387100	NM_032408	Plate1	B07	195	16	8.93855	1.01524
7	Plate 3 Duplex 1	F08	RNF113A	7737	5902157	NM_006978	Plate1	B08	119	10	9.17431	1.0994
8	Plate 3 Duplex 1	G03	NHLRC1	378884	40255282	NM_198586	Plate1	B09	228	15	7.04225	0.338329
9	Plate 3 Duplex 1	G05	TRIM48	79097	201862059	NM_024114	Plate1	B10	68	3	4.61538	-0.527983
10	Plate 3 Duplex 1	G07	MLLT10	8028	57546898	NM_001009569	Plate1	B11	282	14	5.22388	-0.31077
11	Plate 3 Duplex 1	B05	TRIL	9865	116875827	NM_014817	Plate1	C02	207	14	7.25389	0.413874
12	Plate 3 Duplex 1	C04	RNF26	79102	34878803	NM_032015	Plate1	C03	244	14	6.08696	-0.00268072
13	Plate 3 Duplex 1	D03	MARCH7	64844	53828927	NM_022826	Plate1	C04	221	6	2.7907	-1.17934
14	Plate 3 Duplex 1	D05	TRIM54	57159	34878869	NM_187841	Plate1	C05	255	16	6.69456	0.214214
15	Plate 3 Duplex 1	D07	MEX3B	84206	47894110	NM_032246	Plate1	C06	248	11	4.64135	-0.518714
16	Plate 3 Duplex 1	G04	BIRC8	112401	16974127	NM_033341	Plate1	C08	230	16	7.47664	0.493388
17	Plate 3 Duplex 1	G06	MARCH1	55016	53759068	NM_017923	Plate1	C09	162	9	5.88235	-0.0757174
18	Plate 3 Duplex 1	G08	RNF115	27246	33859667	NM_014455	Plate1	C10	283	13	4.81481	-0.456793
19	Plate 3 Duplex 1	D09	LPXN	9404	4758669	NM_004811	Plate1	C11	316	15	4.98339	-0.396618
20	Plate 3 Duplex 1	B07	RNF145	153830	21389514	NM_144726	Plate1	D02	227	20	9.66184	1.27343
21	Plate 3 Duplex 1	C06	RNF13	11342	145309290	NM_183384	Plate1	D03	187	19	11.3095	1.8616
22	Plate 3 Duplex 1	D04	OTUD7B	56957	118026941	NM_020205	Plate1	D05	254	16	6.72269	0.224255
23	Plate 3 Duplex 1	D06	SYVN1	84447	51317310	NM_032431	Plate1	D06	155	3	1.97368	-1.47098
24	Plate 3 Duplex 1	D08	RNF14	9604	34577097	NM_183399	Plate1	D07	199	4	2.05128	-1.44328
25	Plate 3 Duplex 1	B09	KDM5D	8284	56243542	NM_004653	Plate1	D08	244	10	4.2735	-0.650023
26	Plate 3 Duplex 1	B11	TRIM46	80128	42415489	NM_025058	Plate1	D09	194	10	5.43478	-0.235485
27	Plate 3 Duplex 1	B13	RFPL1	5988	149408129	NM_021026	Plate1	D10	243	13	5.65217	-0.157884
28	Plate 3 Duplex 1	D11	TRIM13	10206	16445410	NM_005798	Plate1	D11	206	11	5.64103	-0.161863
29	Plate 3 Duplex 1	B04	RNF216	54476	46370055	NM_207111	Plate1	E02	190	5	2.7027	-1.21075
30	Plate 3 Duplex 1	C08	VPS8	23355	112181165	NM_015303	Plate1	E03	250	25	11.1111	1.79078
31	Plate 3 Duplex 1	E03	NEURL	9148	21314780	NM_004210	Plate1	E04	207	29	16.2921	3.64023
32	Plate 3 Duplex 1	E05	RNF17	56163	94421470	NM_031277	Plate1	E05	216	8	3.84615	-0.802573
33	Plate 3 Duplex 1	E07	RNF146	81847	33636757	NM_030963	Plate1	E06	214	9	4.39024	-0.608351
34	Plate 3 Duplex 1	B10	TRIM43B	653192	113413080	XM_926437	Plate1	E07	238	7	3.0303	-1.0938
35	Plate 3 Duplex 1	B12	PHF3	23469	141801721	NM_015153	Plate1	E08	124	5	4.20168	-0.675662
36	Plate 3 Duplex 1	B14	RNF183	138065	153252109	NM_145051	Plate1	E09	178	14	8.53659	0.871755
37	Plate 3 Duplex 1	D10	RNF11	26994	156630999	NM_014372	Plate1	E10	226	14	6.60377	0.181806
38	Plate 3 Duplex 1	D13	BFAR	51283	7706090	NM_016561	Plate1	E11	191	8	4.37158	-0.615011
39	Plate 3 Duplex 1	B06	LTN1	26046	31657110	NM_015565	Plate1	F02	305	25	8.92857	1.01168
40	Plate 3 Duplex 1	E04	LNX2	222484	153791779	NM_153371	Plate1	F04	184	20	12.1951	2.17773
41	Plate 3 Duplex 1	E06	RNF24	11237	10518498	NM_007219	Plate1	F05	174	10	6.09756	0.00110472
42	Plate 3 Duplex 1	E08	PHF2	5253	117190341	NM_005392	Plate1	F06	184	11	6.35838	0.094209
43	Plate 3 Duplex 1	C09	TRIM49	57093	35493773	NM_020358	Plate1	F07	211	16	8.20513	0.753436
44	Plate 3 Duplex 1	C11	RNF4	6047	156071484	NM_002938	Plate1	F08	183	11	6.39535	0.107405
45	Plate 3 Duplex 1	C13	CHFR	55743	8922674	NM_018223	Plate1	F09	285	6	2.15054	-1.40785
46	Plate 3 Duplex 1	D12	TRIM58	25893	112421126	NM_015431	Plate1	F10	149	6	4.1958	-0.677759
47	Plate 3 Duplex 1	B08	SYTL3	94120	110227630	NM_001009991	Plate1	G02	89	3	3.48837	-0.930289
48	Plate 3 Duplex 1	F03	TRIM65	201292	38679904	NM_173547	Plate1	G03	110	3	2.80374	-1.17468
49	Plate 3 Duplex 1	F05	KDM5C	8242	109255242	NM_004187	Plate1	G04	204	18	9.67742	1.279
50	Plate 3 Duplex 1	F07	KDM1B	221656	116256450	NM_153042	Plate1	G05	209	12	6.09137	-0.00110506
51	Plate 3 Duplex 1	C10	SYTL4	94121	18152766	NM_080737	Plate1	G06	215	10	4.87805	-0.434221
52	Plate 3 Duplex 1	C12	LMO7	4008	111119012	NM_005358	Plate1	G07	193	4	2.1164	-1.42004
53	Plate 3 Duplex 1	C14	MNAT1	4331	49574512	NM_002431	Plate1	G08	182	9	5.20231	-0.318469
54	Plate 3 Duplex 1	D14	RNF19A	25897	35493781	NM_015435	Plate1	G10	150	10	7.14286	0.374241
55	Plate 3 Duplex 1	E09	PEX10	5192	24797087	NM_002617	Plate 2	B02	114	7	6.54206	0.170346
56	Plate 3 Duplex 1	F09	PCGF5	84333	83816965	NM_032373	Plate 2	B03	225	14	6.63507	0.208934
57	Plate 3 Duplex 1	F11	TRIM21	6737	56549143	NM_003141	Plate 2	B04	247	6	2.48963	-1.51084
58	Plate 3 Duplex 1	F13	TRIM50	135892	31342404	NM_178125	Plate 2	B05	295	12	4.24028	-0.784568
59	Plate 3 Duplex 1	C16	PCGF2	7703	37595566	NM_007144	Plate 2	B06	203	6	3.04569	-1.28016
60	Plate 3 Duplex 1	C18	TRIM59	286827	87080803	NM_173084	Plate 2	B07	284	24	9.23077	1.28578
61	Plate 3 Duplex 1	C20	RNF43	54894	56711321	NM_017763	Plate 2	B08	111	7	6.73077	0.248635
62	Plate 3 Duplex 1	D15	BRPF1	7862	51173721	NM_004634	Plate 2	B09	233	14	6.39269	0.108381
63	Plate 3 Duplex 1	D17	TRIM38	10475	24497622	NM_006355	Plate 2	B10	224	14	6.66667	0.222042
64	Plate 3 Duplex 1	D19	CBLL1	79872	13376203	NM_024814	Plate 2	B11	263	10	3.95257	-0.903928
65	Plate 3 Duplex 1	E11	ZNRF1	84937	30089958	NM_032268	Plate 2	C02	366	25	7.33138	0.497804
66	Plate 3 Duplex 1	F10	MDM4	4194	88702790	NM_002393	Plate 2	C03	265	16	6.4257	0.122075
67	Plate 3 Duplex 1	G09	MKRN1	23608	21359891	NM_013446	Plate 2	C04	290	11	3.94265	-0.908042
68	Plate 3 Duplex 1	G11	RNF207	388591	124487386	NM_207396	Plate 2	C05	319	17	5.62914	-0.208387
69	Plate 3 Duplex 1	G13	TRIM74	378108	38524611	NM_198853	Plate 2	C06	373	25	7.18391	0.436624
70	Plate 3 Duplex 1	D16	RNF126	55658	37622893	NM_194460	Plate 2	C08	326	15	4.82315	-0.542759
71	Plate 3 Duplex 1	D18	RNF169	254225	148839381	NM_001098638	Plate 2	C09	209	12	6.09137	-0.0166256
72	Plate 3 Duplex 1	D20	LNX1	84708	14249127	NM_032622	Plate 2	C10	256	15	6.22407	0.0384245
73	Plate 3 Duplex 1	G15	TRIM10	10107	157426895	NM_052828	Plate 2	C11	242	6	2.54237	-1.48896
74	Plate 3 Duplex 1	E13	TRIM5	85363	14719417	NM_033034	Plate 2	D02	354	25	7.59878	0.60874
75	Plate 3 Duplex 1	F12	G2E3	55632	33620748	NM_017769	Plate 2	D03	236	14	6.30631	0.0725426
76	Plate 3 Duplex 1	G10	RNFT2	84900	158186611	NM_032814	Plate 2	D05	259	14	5.71429	-0.173063
77	Plate 3 Duplex 1	G12	MARCH3	115123	31341961	NM_178450	Plate 2	D06	257	13	5.32787	-0.333372
78	Plate 3 Duplex 1	G14	RNF165	494470	57165360	NM_152470	Plate 2	D07	263	20	8.23045	0.870794
79	Plate 3 Duplex 1	E15	PHF8	23133	32698699	NM_015107	Plate 2	D08	226	9	4.14747	-0.823074
80	Plate 3 Duplex 1	E17	RNF182	221687	142373276	NM_152737	Plate 2	D09	277	19	7.36434	0.511479
81	Plate 3 Duplex 1	E19	RNF214	257160	116235450	NM_207343	Plate 2	D10	168	12	7.69231	0.647539
82	Plate 3 Duplex 1	G17	TRIM27	5987	115387097	NM_006510	Plate 2	D11	281	18	6.84411	0.295654
83	Plate 3 Duplex 1	E10	MYLIP	29116	38788242	NM_013262	Plate 2	E02	273	19	7.48031	0.559592
84	Plate 3 Duplex 1	F14	MEFV	4210	4557742	NM_000243	Plate 2	E03	289	27	10.3053	1.73158
85	Plate 3 Duplex 1	B15	ZSWIM2	151112	71043931	NM_182521	Plate 2	E04	257	31	13.7168	3.14686
86	Plate 3 Duplex 1	B17	PHF19	26147	58331162	NM_001009936	Plate 2	E05	399	37	10.221	1.69659
87	Plate 3 Duplex 1	B19	DTX1	1840	4758201	NM_004416	Plate 2	E06	252	14	5.88235	-0.103339
88	Plate 3 Duplex 1	E16	RNF170	81790	21361953	NM_030954	Plate 2	E07	324	21	6.93069	0.331576
89	Plate 3 Duplex 1	E18	UHRF1	29128	115430234	NM_001048201	Plate 2	E08	225	6	2.73973	-1.40709
90	Plate 3 Duplex 1	E20	PJA2	9867	7662123	NM_014819	Plate 2	E09	230	21	10.0478	1.62476
91	Plate 3 Duplex 1	G16	EEA1	8411	110227599	NM_003566	Plate 2	E10	253	17	7.20339	0.444706
92	Plate 3 Duplex 1	G19	TRIM61	391712	60099473	NM_001012414	Plate 2	E11	271	24	9.7166	1.48734
93	Plate 3 Duplex 1	E12	TRIM11	81559	24497621	NM_145214	Plate 2	F02	260	14	5.69106	-0.1827
94	Plate 3 Duplex 1	B16	ZFAND5	7763	156231045	NM_006007	Plate 2	F04	326	34	11.6438	2.28687
95	Plate 3 Duplex 1	B18	PDC	5132	32967590	NM_002597	Plate 2	F05	276	17	6.56371	0.179328
96	Plate 3 Duplex 1	B20	PHF10	55274	19747274	NM_018288	Plate 2	F06	279	17	6.48855	0.148148
97	Plate 3 Duplex 1	F15	RBBP6	5930	38683862	NM_006910	Plate 2	F07	317	8	2.589	-1.46962
98	Plate 3 Duplex 1	F17	RNF111	54778	37595552	NM_017610	Plate 2	F08	270	13	5.05837	-0.445178
99	Plate 3 Duplex 1	F19	TRIM47	91107	54792145	NM_033452	Plate 2	F09	217	8	3.82775	-0.95571
100	Plate 3 Duplex 1	G18	RNF213	57674	66571326	NM_020914	Plate 2	F10	244	12	5.17241	-0.397864
101	Plate 3 Duplex 1	E14	TRAF7	84231	14150010	NM_032271	Plate 2	G02	157	6	3.97351	-0.895241
102	Plate 3 Duplex 1	C15	TRIM64C	646754	89033945	XM_929704	Plate 2	G03	277	12	4.5283	-0.66508
103	Plate 3 Duplex 1	C17	MUL1	79594	13375704	NM_024544	Plate 2	G04	296	20	7.24638	0.46254
104	Plate 3 Duplex 1	C19	SIAH2	6478	55925659	NM_005067	Plate 2	G05	263	11	4.36508	-0.732794
105	Plate 3 Duplex 1	F16	UNK	85451	122937238	NM_001080419	Plate 2	G06	355	17	5.02959	-0.457117
106	Plate 3 Duplex 1	F18	TRIM68	55128	37622898	NM_018073	Plate 2	G07	280	11	4.08922	-0.847238
107	Plate 3 Duplex 1	F20	XIAP	331	32528298	NM_001167	Plate 2	G08	193	4	2.1164	-1.66568
108	Plate 3 Duplex 1	G20	TRIM29	23650	109826574	NM_012101	Plate 2	G10	363	11	3.125	-1.24725
109	Plate 2 Duplex 1	B03	SPSB4	92369	18254459	NM_080862	Plate 3	B02	136	8	6.25	0.194756
110	Plate 2 Duplex 1	C03	TRIM7	81786	44680123	NM_203294	Plate 3	B03	261	25	10.5932	2.11043
111	Plate 2 Duplex 1	C05	MDM2	4193	46488908	NM_006879	Plate 3	B04	108	6	5.88235	0.0325972
112	Plate 2 Duplex 1	C07	PHF7	51533	27894288	NM_016483	Plate 3	B05	144	6	4.34783	-0.644239
113	Plate 2 Duplex 1	F04	MGRN1	23295	44917607	NM_015246	Plate 3	B06	55	3	5.76923	-0.0172978
114	Plate 2 Duplex 1	F06	RNF7	9616	156071506	NM_014245	Plate 3	B07	206	25	13.8122	3.53021
115	Plate 2 Duplex 1	F08	WDSUB1	151525	22749102	NM_152528	Plate 3	B08	64	4	6.66667	0.378536
116	Plate 2 Duplex 1	G03	SH3RF2	153769	22749146	NM_152550	Plate 3	B09	142	4	2.89855	-1.28347
117	Plate 2 Duplex 1	G05	RNF150	57484	58331203	NM_020724	Plate 3	B10	185	12	6.93642	0.497515
118	Plate 2 Duplex 1	G07	PCGF3	10336	59710102	NM_006315	Plate 3	B11	154	6	4.05405	-0.773814
119	Plate 2 Duplex 1	B05	FBXL5	26234	21536438	NM_012161	Plate 3	C02	169	11	6.96203	0.50881
120	Plate 2 Duplex 1	C04	INTS12	57117	21361850	NM_020395	Plate 3	C03	274	17	6.61479	0.355653
121	Plate 2 Duplex 1	D03	CHD5	26038	24308088	NM_015557	Plate 3	C04	283	13	4.81481	-0.438264
122	Plate 2 Duplex 1	D05	RNF180	285671	31341781	NM_178532	Plate 3	C05	243	10	4.29185	-0.668931
123	Plate 2 Duplex 1	D07	PHF21A	51317	156546909	NM_016621	Plate 3	C06	356	21	6.26866	0.202985
124	Plate 2 Duplex 1	G04	PHF23	79142	116268090	NM_024297	Plate 3	C08	109	2	1.86916	-1.73751
125	Plate 2 Duplex 1	G06	RNF25	64320	34878786	NM_022453	Plate 3	C09	135	7	5.46875	-0.149831
126	Plate 2 Duplex 1	G08	PHF13	148479	24432092	NM_153812	Plate 3	C10	255	16	6.69456	0.390839
127	Plate 2 Duplex 1	J03	RNF149	284996	31543079	NM_173647	Plate 3	C11	175	3	1.74419	-1.79263
128	Plate 2 Duplex 1	B07	FBXO34	55030	40807492	NM_017943	Plate 3	D02	241	14	6.1674	0.158324
129	Plate 2 Duplex 1	C06	ZNF592	9640	108860696	NM_014630	Plate 3	D03	240	18	8.10811	1.01432
130	Plate 2 Duplex 1	D04	MLLT6	4302	133908639	NM_005937	Plate 3	D05	110	5	4.7619	-0.461601
131	Plate 2 Duplex 1	D06	ZMYND11	10771	5729745	NM_006624	Plate 3	D06	300	13	4.52962	-0.564057
132	Plate 2 Duplex 1	D08	BIRC3	330	33946283	NM_001165	Plate 3	D07	191	17	9.77011	1.74738
133	Plate 2 Duplex 1	H03	ZNF330	27309	142385621	NM_014487	Plate 3	D08	273	12	4.5977	-0.534027
134	Plate 2 Duplex 1	H05	RNF148	378925	37675276	NM_198085	Plate 3	D09	150	7	4.8951	-0.40285
135	Plate 2 Duplex 1	H07	VPS41	27072	114199472	NM_080631	Plate 3	D10	164	8	5.12821	-0.300036
136	Plate 2 Duplex 1	J05	TRIM37	4591	52487175	NM_001005207	Plate 3	D11	183	5	2.80899	-1.32298
137	Plate 2 Duplex 1	B04	FBXO39	162517	23397499	NM_153230	Plate 3	E02	161	6	3.87097	-0.854568
138	Plate 2 Duplex 1	C08	MEX3A	92312	147902745	NM_001093725	Plate 3	E03	241	19	8.55856	1.213
139	Plate 2 Duplex 1	E03	ZNRF3	84133	150378446	NM_032173	Plate 3	E04	190	13	7.34463	0.677568
140	Plate 2 Duplex 1	E05	KDM5B	10765	57242795	NM_006618	Plate 3	E05	217	8	3.82775	-0.87363
141	Plate 2 Duplex 1	E07	RNF123	63891	37588868	NM_022064	Plate 3	E06	225	18	8.69565	1.27346
142	Plate 2 Duplex 1	H04	TRIM2	23321	15011942	NM_015271	Plate 3	E07	168	7	4.34783	-0.644239
143	Plate 2 Duplex 1	H06	RNF103	7844	37595534	NM_005667	Plate 3	E08	147	5	3.52113	-1.00887
144	Plate 2 Duplex 1	H08	TRIML1	339976	31560863	NM_178556	Plate 3	E09	85	1	1.19048	-2.03686
145	Plate 2 Duplex 1	J04	LRSAM1	90678	53729362	NM_001005374	Plate 3	E10	101	5	5.20833	-0.264694
146	Plate 2 Duplex 1	J07	BIRC7	79444	21536419	NM_022161	Plate 3	E11	177	9	5.35714	-0.199058
147	Plate 2 Duplex 1	B06	FBXO10	26267	124244082	NM_012166	Plate 3	F02	287	13	4.74453	-0.469266
148	Plate 2 Duplex 1	E04	ZNRF2	223082	40316919	NM_147128	Plate 3	F04	238	16	7.20721	0.616953
149	Plate 2 Duplex 1	E06	MEX3D	399664	145651824	NM_203304	Plate 3	F05	226	12	5.60748	-0.088643
150	Plate 2 Duplex 1	E08	TRIM67	440730	134288905	NM_001004342	Plate 3	F06	206	11	5.64103	-0.0738455
151	Plate 2 Duplex 1	I03	RFPL2	10739	148743773	NM_001098527	Plate 3	F07	225	16	7.6555	0.814684
152	Plate 2 Duplex 1	I05	PHF16	9767	117190333	NM_001077445	Plate 3	F08	271	6	2.26415	-1.56329
153	Plate 2 Duplex 1	I07	TRIM22	10346	117938315	NM_006074	Plate 3	F09	217	10	4.83092	-0.431161
154	Plate 2 Duplex 1	J06	RNF139	11236	38045935	NM_007218	Plate 3	F10	258	16	6.61157	0.354234
155	Plate 2 Duplex 1	B08	SOCS4	122809	40807478	NM_080867	Plate 3	G02	152	9	6.29371	0.214034
156	Plate 2 Duplex 1	F03	PHF17	79960	111154093	NM_024900	Plate 3	G03	119	9	8.18182	1.04683
157	Plate 2 Duplex 1	F05	TRIM42	287015	29029527	NM_152616	Plate 3	G04	201	13	6.91489	0.488022
158	Plate 2 Duplex 1	F07	BAHD1	22893	139394603	NM_014952	Plate 3	G05	236	14	6.30631	0.219591
159	Plate 2 Duplex 1	I04	STUB1	10273	56181386	NM_005861	Plate 3	G06	185	15	8.82353	1.32987
160	Plate 2 Duplex 1	I06	MARCH6	10299	33589845	NM_005885	Plate 3	G07	190	10	5.55556	-0.111544
161	Plate 2 Duplex 1	I08	BARD1	580	157266327	NM_000465	Plate 3	G08	231	11	5	-0.356584
162	Plate 2 Duplex 1	J08	RAPSN	5913	38045927	NM_032645	Plate 3	G10	218	15	7.38916	0.697209
163	Plate 2 Duplex 1	K03	MARCH5	54708	58532582	NM_017824	Plate 4	B02	54	1	1.88679	-1.64961
164	Plate 2 Duplex 1	L03	RNF34	80196	37595536	NM_025126	Plate 4	B03	321	13	4.22078	-0.831303
165	Plate 2 Duplex 1	L05	TRIM64	120146	210147599	NM_001136486	Plate 4	B04	340	15	4.61538	-0.692952
166	Plate 2 Duplex 1	L07	ZNF185	7739	148298721	NM_007150	Plate 4	B05	300	13	4.52962	-0.723023
167	Plate 2 Duplex 1	O04	RNF41	10193	37588860	NM_194359	Plate 4	B06	252	16	6.77966	0.065853
168	Plate 2 Duplex 1	O06	MARCH10	162333	154937341	NM_001100875	Plate 4	B07	197	10	5.34759	-0.436236
169	Plate 2 Duplex 1	O08	CXXC1	30827	156142179	NM_014593	Plate 4	B08	91	6	7.05882	0.163729
170	Plate 2 Duplex 1	B09	ASB1	51665	94721247	NM_001040445	Plate 4	B09	297	23	8.39416	0.631904
171	Plate 2 Duplex 1	B11	FBXL22	283807	42794272	NM_203373	Plate 4	B10	125	2	1.62602	-1.74104
172	Plate 2 Duplex 1	B13	ASB2	51676	22208962	NM_016150	Plate 4	B11	222	9	4.22535	-0.829699
173	Plate 2 Duplex 1	K05	MAP3K1	4214	153945764	NM_005921	Plate 4	C02	94	6	6.81818	0.0793586
174	Plate 2 Duplex 1	L04	RFWD3	55159	71143111	NM_018124	Plate 4	C03	967	60	6.61521	0.0081975
175	Plate 2 Duplex 1	M03	ARIH2	10425	83776589	NM_006321	Plate 4	C04	175	14	8.69565	0.737608
176	Plate 2 Duplex 1	M05	TRIM24	8805	47419908	NM_003852	Plate 4	C05	329	20	6.47249	-0.0418419
177	Plate 2 Duplex 1	M07	TRAF3	7187	22027615	NM_003300	Plate 4	C06	160	9	5.96026	-0.221431
178	Plate 2 Duplex 1	B10	ASB10	136371	22208953	NM_080871	Plate 4	C08	237	17	7.72727	0.39809
179	Plate 2 Duplex 1	B12	RAB40B	10966	5803162	NM_006822	Plate 4	C09	165	6	3.77358	-0.988091
180	Plate 2 Duplex 1	B14	ASB4	51666	7706378	NM_016116	Plate 4	C10	278	9	3.34572	-1.1381
181	Plate 2 Duplex 1	E09	PHF11	51131	94681068	NM_001040444	Plate 4	C11	190	9	4.97238	-0.56779
182	Plate 2 Duplex 1	K07	RNF220	55182	46397374	NM_018150	Plate 4	D02	366	26	7.64706	0.369967
183	Plate 2 Duplex 1	L06	RNF151	146310	116686097	NM_174903	Plate 4	D03	233	17	7.87037	0.448261
184	Plate 2 Duplex 1	M04	RNF215	200312	63025219	NM_001017981	Plate 4	D05	307	26	9.25267	0.932901
185	Plate 2 Duplex 1	M06	TRIM69	140691	88999602	NM_080745	Plate 4	D06	319	25	8.5034	0.670204
186	Plate 2 Duplex 1	M08	AIRE	326	4557292	NM_000658	Plate 4	D07	181	6	3.42857	-1.10905
187	Plate 2 Duplex 1	C09	TRIM9	114088	46370050	NM_015163	Plate 4	D08	236	15	6.78733	0.0685419
188	Plate 2 Duplex 1	C11	TRIM34	53840	145275182	NM_130390	Plate 4	D09	236	14	6.30631	-0.100107
189	Plate 2 Duplex 1	C13	TRIM39	56658	25777697	NM_172016	Plate 4	D10	214	18	9.18367	0.908711
190	Plate 2 Duplex 1	K04	RNF157	114804	222144269	NM_052916	Plate 4	E02	215	22	11.399	1.6854
191	Plate 2 Duplex 1	L08	WDR59	79726	58331265	NM_030581	Plate 4	E03	337	41	13.8514	2.54522
192	Plate 2 Duplex 1	N03	TRIM25	7706	15208652	NM_005082	Plate 4	E04	289	39	15.6	3.1583
193	Plate 2 Duplex 1	N05	BIRC2	329	41349435	NM_001166	Plate 4	E05	251	20	8.65801	0.72441
194	Plate 2 Duplex 1	N07	BAZ2B	29994	94681062	NM_013450	Plate 4	E06	199	10	5.29101	-0.456077
195	Plate 2 Duplex 1	C10	PRPF19	27339	34222313	NM_014502	Plate 4	E07	117	3	2.63158	-1.38848
196	Plate 2 Duplex 1	C12	RBX1	9978	22091459	NM_014248	Plate 4	E08	224	13	6.16114	-0.151004
197	Plate 2 Duplex 1	C14	TRIM49C	642612	305377071	NM_001195234	Plate 4	E09	225	6	2.73973	-1.35057
198	Plate 2 Duplex 1	E10	PHF6	84295	63478059	NM_032335	Plate 4	E10	168	5	3.06748	-1.23565
199	Plate 2 Duplex 1	E13	TRIM8	81603	148596967	NM_030912	Plate 4	E11	215	11	5.39216	-0.420612
200	Plate 2 Duplex 1	K06	RNF181	51255	75709223	NM_016494	Plate 4	F02	369	20	5.73066	-0.301932
201	Plate 2 Duplex 1	N04	DZIP3	9666	40254857	NM_014648	Plate 4	F04	259	22	9.2827	0.94343
202	Plate 2 Duplex 1	N06	TRIM51	84767	14249255	NM_032681	Plate 4	F05	256	13	5.34979	-0.435465
203	Plate 2 Duplex 1	N08	UBR1	197131	83656781	NM_174916	Plate 4	F06	161	10	6.62252	0.0107575
204	Plate 2 Duplex 1	D09	TRIM6-TRIM34	445372	51477689	NM_001003819	Plate 4	F07	231	13	5.9633	-0.220366
205	Plate 2 Duplex 1	D11	MARCH8	220972	50539413	NM_001002266	Plate 4	F08	220	15	7.31707	0.254272
206	Plate 2 Duplex 1	D13	PHF20L1	51105	109134329	NM_032205	Plate 4	F09	201	10	5.2356	-0.475501
207	Plate 2 Duplex 1	E12	TRIM63	84676	19924162	NM_032588	Plate 4	F10	179	9	5.29412	-0.454985
208	Plate 2 Duplex 1	K08	ZNF547	284306	38044285	NM_173631	Plate 4	G02	191	15	8.52273	0.67698
209	Plate 2 Duplex 1	O03	TRAF4	9618	118402591	NM_004295	Plate 4	G03	227	16	7.58294	0.347486
210	Plate 2 Duplex 1	O05	CGRRF1	10668	50726998	NM_006568	Plate 4	G04	261	29	12.5	2.07143
211	Plate 2 Duplex 1	O07	MSL2	55167	38570120	NM_018133	Plate 4	G05	309	13	4.39189	-0.77131
212	Plate 2 Duplex 1	D10	MIB2	142678	21264329	NM_080875	Plate 4	G06	216	11	5.36585	-0.429834
213	Plate 2 Duplex 1	D12	TRIM62	55223	217035094	NM_018207	Plate 4	G07	206	14	7.29167	0.245365
214	Plate 2 Duplex 1	D14	RNF125	54941	115387109	NM_017831	Plate 4	G08	222	10	4.71698	-0.657332
215	Plate 2 Duplex 1	E14	RFPL4B	442247	153791359	NM_001013734	Plate 4	G10	147	15	11.3636	1.67302
216	Plate 2 Duplex 1	F09	WDR24	84219	142357093	NM_032259	Plate 5	B02	169	12	7.64331	0.655616
217	Plate 2 Duplex 1	G09	RNF8	9025	157419146	NM_183078	Plate 5	B03	307	19	6.59722	0.152828
218	Plate 2 Duplex 1	G11	RNF38	152006	89903028	NM_194329	Plate 5	B04	154	11	7.69231	0.679165
219	Plate 2 Duplex 1	G13	TRIM15	89870	149193330	NM_033229	Plate 5	B05	272	21	8.36653	1.00322
220	Plate 2 Duplex 1	J10	PJA1	64219	90704844	NM_022368	Plate 5	B06	374	17	4.7619	-0.729291
221	Plate 2 Duplex 1	J12	MEX3C	51320	148229133	NM_016626	Plate 5	B07	306	19	6.62021	0.163876
222	Plate 2 Duplex 1	J14	DPF1	8193	4758797	NM_004647	Plate 5	B08	298	10	3.47222	-1.34916
223	Plate 2 Duplex 1	K09	TRIM51GP	120824	89033943	XM_062300	Plate 5	B09	315	17	5.7047	-0.276151
224	Plate 2 Duplex 1	K11	MARCH11	441061	156523243	NM_001102562	Plate 5	B10	427	17	4.14634	-1.02515
225	Plate 2 Duplex 1	K13	MTF2	22823	141802285	NM_007358	Plate 5	B11	345	17	5.18293	-0.526933
226	Plate 2 Duplex 1	F11	DTX4	23220	148237497	NM_015177	Plate 5	C02	452	23	5.36131	-0.441198
227	Plate 2 Duplex 1	G10	DTX3L	151636	31377615	NM_138287	Plate 5	C03	374	22	6.25	-0.0140595
228	Plate 2 Duplex 1	H09	UBE4B	10277	157739865	NM_006048	Plate 5	C04	463	22	4.98866	-0.620304
229	Plate 2 Duplex 1	H11	CCL20	6364	4759075	NM_004591	Plate 5	C05	358	20	5.91716	-0.174034
230	Plate 2 Duplex 1	H13	RNF141	50862	38045936	NM_016422	Plate 5	C06	283	16	5.99251	-0.137819
231	Plate 2 Duplex 1	K10	SHPRH	257218	111548663	NM_173082	Plate 5	C08	344	30	9.55414	1.57403
232	Plate 2 Duplex 1	K12	PHRF1	57661	221139763	NM_020901	Plate 5	C09	466	23	5.19187	-0.522633
233	Plate 2 Duplex 1	K14	UHRF2	115426	23312363	NM_152896	Plate 5	C10	318	19	6.35452	0.0361742
234	Plate 2 Duplex 1	N09	RNF130	55819	38176162	NM_018434	Plate 5	C11	391	33	9.21788	1.41241
235	Plate 2 Duplex 1	F13	TRIM26	7726	60279912	NM_003449	Plate 5	D02	311	19	6.50685	0.109391
236	Plate 2 Duplex 1	G12	TNFAIP3	7128	26051241	NM_006290	Plate 5	D03	391	36	10.1408	1.85602
237	Plate 2 Duplex 1	H10	TOPORS	10210	40805103	NM_005802	Plate 5	D05	365	25	7.35294	0.516053
238	Plate 2 Duplex 1	H12	WHSC1	7468	6594682	NM_007331	Plate 5	D06	305	25	8.92857	1.27336
239	Plate 2 Duplex 1	H14	TRIM17	51127	68160934	NM_001024941	Plate 5	D07	317	20	6.73401	0.218571
240	Plate 2 Duplex 1	L09	HLTF	6596	117968479	NM_139048	Plate 5	D08	306	22	7.74648	0.705202
241	Plate 2 Duplex 1	L11	DTX2	113878	156564385	NM_001102596	Plate 5	D09	281	24	9.33852	1.47039
242	Plate 2 Duplex 1	L13	MIB1	57534	62868229	NM_020774	Plate 5	D10	373	23	6.57143	0.140431
243	Plate 2 Duplex 1	N11	TRAF5	7188	77404347	NM_001033910	Plate 5	D11	326	17	5.50162	-0.373759
244	Plate 2 Duplex 1	F10	PCGF1	84759	109240537	NM_032673	Plate 5	E02	258	6	2.38095	-1.87366
245	Plate 2 Duplex 1	G14	MKRN3	7681	74272285	NM_005664	Plate 5	E03	456	43	10.4116	1.98617
246	Plate 2 Duplex 1	I09	RNF31	55072	109150430	NM_017999	Plate 5	E04	423	42	11.0236	2.28031
247	Plate 2 Duplex 1	I11	ZNRF4	148066	150170724	NM_181710	Plate 5	E05	341	24	7.57098	0.62085
248	Plate 2 Duplex 1	I13	RNF166	115992	31343485	NM_178841	Plate 5	E06	377	28	8.02292	0.838071
249	Plate 2 Duplex 1	L10	VPS11	55823	62865896	NM_021729	Plate 5	E07	353	26	7.95107	0.803536
250	Plate 2 Duplex 1	L12	PATZ1	23598	14670359	NM_014323	Plate 5	E08	371	16	4.50704	-0.851787
251	Plate 2 Duplex 1	L14	BRAP	8315	188497704	NM_006768	Plate 5	E09	321	20	6.64452	0.17556
252	Plate 2 Duplex 1	N10	KMT2B	9757	7662045	NM_014727	Plate 5	E10	388	21	5.72207	-0.267801
253	Plate 2 Duplex 1	N13	PRICKLE2	166336	144922704	NM_198859	Plate 5	E11	308	13	4.40678	-0.899977
254	Plate 2 Duplex 1	F12	TRIM3	10612	32454738	NM_006458	Plate 5	F02	390	20	5.40541	-0.420002
255	Plate 2 Duplex 1	I10	RCHY1	25898	58331198	NM_001009922	Plate 5	F04	322	18	5.92105	-0.172163
256	Plate 2 Duplex 1	I12	TRAIP	10293	5032194	NM_005879	Plate 5	F05	298	18	6.42857	0.0717683
257	Plate 2 Duplex 1	I14	PRICKLE3	4007	7710128	NM_006150	Plate 5	F06	354	19	5.67164	-0.292039
258	Plate 2 Duplex 1	M09	TRIM4	89122	15011939	NM_033017	Plate 5	F07	366	11	3.09859	-1.52874
259	Plate 2 Duplex 1	M11	PCGF6	84108	37655164	NM_032154	Plate 5	F08	357	14	4.08163	-1.05625
260	Plate 2 Duplex 1	M13	TRIM31	11074	62865603	NM_007028	Plate 5	F09	366	20	5.78035	-0.239792
261	Plate 2 Duplex 1	N12	RNF113B	140432	110349795	NM_178861	Plate 5	F10	327	22	7.21311	0.448848
262	Plate 2 Duplex 1	F14	ZNF645	158506	142371555	NM_152577	Plate 5	G02	164	1	0.613497	-2.72316
263	Plate 2 Duplex 1	J09	CBLB	868	54112419	NM_170662	Plate 5	G03	290	24	9.02256	1.31853
264	Plate 2 Duplex 1	J11	RNF6	6049	34305292	NM_183043	Plate 5	G04	294	13	4.62633	-0.794451
265	Plate 2 Duplex 1	J13	RNF144A	9781	156523963	NM_014746	Plate 5	G05	488	32	7.01754	0.35485
266	Plate 2 Duplex 1	M10	PARK2	5071	4758883	NM_004562	Plate 5	G06	407	20	5.16796	-0.534127
267	Plate 2 Duplex 1	M12	LMTK3	114783	122937266	NM_001080434	Plate 5	G07	306	14	4.79452	-0.713615
268	Plate 2 Duplex 1	M14	TRIM77	390231	89035024	XM_936301	Plate 5	G08	269	8	3.06513	-1.54482
269	Plate 2 Duplex 1	N14	PHF1	5252	21536450	NM_002636	Plate 5	G10	290	13	4.69314	-0.762342
270	Plate 2 Duplex 1	O09	RNF138	51444	38045932	NM_016271	Plate 6	B02	307	19	6.59722	0.628915
271	Plate 2 Duplex 1	B15	FBXL3	26224	16306583	NM_012158	Plate 6	B03	260	14	5.69106	0.114536
272	Plate 2 Duplex 1	B17	FBXO36	130888	111185921	NM_174899	Plate 6	B04	279	9	3.33333	-1.22381
273	Plate 2 Duplex 1	B19	FBXW7	55294	61743925	NM_001013415	Plate 6	B05	243	12	5.19481	-0.167158
274	Plate 2 Duplex 1	E16	PDZRN3	23024	57529736	NM_015009	Plate 6	B06	290	15	5.45455	-0.019718
275	Plate 2 Duplex 1	E18	PRICKLE4	29964	118722346	NM_013397	Plate 6	B07	255	8	3.23887	-1.27743
276	Plate 2 Duplex 1	E20	PHF5A	84844	55925655	NM_032758	Plate 6	B08	460	27	6.23557	0.423623
277	Plate 2 Duplex 1	F15	PHF21B	112885	142373250	NM_138415	Plate 6	B09	278	13	4.90566	-0.331289
278	Plate 2 Duplex 1	F17	MARCH4	57574	57977324	NM_020814	Plate 6	B10	276	12	4.54545	-0.535758
279	Plate 2 Duplex 1	F19	ANKIB1	54467	148596952	NM_019004	Plate 6	B11	211	7	3.43137	-1.16816
280	Plate 2 Duplex 1	O11	TRIM23	373	15208639	NM_001656	Plate 6	C02	213	15	7.57576	1.18438
281	Plate 2 Duplex 1	B16	SOCS1	8651	4507232	NM_003745	Plate 6	C03	279	15	5.68182	0.109292
282	Plate 2 Duplex 1	C15	TRIM41	90933	42516573	NM_201627	Plate 6	C04	390	21	5.69106	0.114536
283	Plate 2 Duplex 1	C17	RNF133	168433	21040268	NM_139175	Plate 6	C05	260	21	8.78661	1.87171
284	Plate 2 Duplex 1	C19	JHDM1D	80853	90093354	NM_030647	Plate 6	C06	283	13	4.81481	-0.382857
285	Plate 2 Duplex 1	F16	RNF5	6048	156631002	NM_006913	Plate 6	C08	297	17	6.07143	0.330452
286	Plate 2 Duplex 1	F18	PHF15	23338	40556369	NM_015288	Plate 6	C09	231	10	4.52489	-0.547433
287	Plate 2 Duplex 1	F20	BRCA1	672	63252875	NM_007298	Plate 6	C10	184	8	4.54545	-0.535758
288	Plate 2 Duplex 1	I15	RNF168	165918	31377565	NM_152617	Plate 6	C11	259	10	4.01606	-0.836263
289	Plate 2 Duplex 1	O13	RNF10	9921	156630998	NM_014868	Plate 6	D02	266	11	4.31373	-0.667297
290	Plate 2 Duplex 1	B18	FBXO33	254170	42558257	NM_203301	Plate 6	D03	271	14	5.44747	-0.0237339
291	Plate 2 Duplex 1	C16	HRC	3270	75905816	NM_002152	Plate 6	D05	270	12	4.65116	-0.475753
292	Plate 2 Duplex 1	C18	MYCBP2	23077	126116564	NM_015057	Plate 6	D06	209	9	4.5	-0.56156
293	Plate 2 Duplex 1	C20	PRICKLE1	144165	23308518	NM_153026	Plate 6	D07	414	23	5.88235	0.223124
294	Plate 2 Duplex 1	G15	IRF2BP1	26145	24308114	NM_015649	Plate 6	D08	268	17	6.77291	0.728643
295	Plate 2 Duplex 1	G17	KMT2D	8085	148762968	NM_003482	Plate 6	D09	279	13	4.88722	-0.341758
296	Plate 2 Duplex 1	G19	CUL9	23113	63082031	NM_015089	Plate 6	D10	178	6	3.48837	-1.1358
297	Plate 2 Duplex 1	I17	TRIM43	129868	20270352	NM_138800	Plate 6	D11	122	8	7.01754	0.867508
298	Plate 2 Duplex 1	O10	TRIM28	10155	14971416	NM_005762	Plate 6	E02	269	13	5.07812	-0.233391
299	Plate 2 Duplex 1	B20	THNSL2	55258	149193322	NM_018271	Plate 6	E03	309	15	5.10204	-0.219815
300	Plate 2 Duplex 1	D15	RNF152	220441	91754187	NM_173557	Plate 6	E04	303	28	10.1818	2.66369
301	Plate 2 Duplex 1	D17	RFWD2	64326	50428921	NM_001001740	Plate 6	E05	291	21	7.77778	1.29905
302	Plate 2 Duplex 1	D19	RSPRY1	89970	45387948	NM_133368	Plate 6	E06	389	34	9.57746	2.32063
303	Plate 2 Duplex 1	G16	PHF12	57649	75677337	NM_020889	Plate 6	E07	377	13	3.57143	-1.08866
304	Plate 2 Duplex 1	G18	MID1	4281	148833497	NM_033290	Plate 6	E08	433	23	5.60976	0.0683864
305	Plate 2 Duplex 1	G20	TRIM14	9830	15208662	NM_014788	Plate 6	E09	331	11	3.4375	-1.16468
306	Plate 2 Duplex 1	I16	TRIM52	84851	34147443	NM_032765	Plate 6	E10	308	6	1.98675	-1.98819
307	Plate 2 Duplex 1	I19	RNF112	7732	117190501	NM_007148	Plate 6	E11	108	9	9.09091	2.04444
308	Plate 2 Duplex 1	O12	RSF1	51773	38788332	NM_016578	Plate 6	F02	235	17	7.79817	1.31062
309	Plate 2 Duplex 1	D16	BMI1	648	39725706	NM_005180	Plate 6	F04	202	8	4.12371	-0.775158
310	Plate 2 Duplex 1	D18	PHF20	51230	110735447	NM_016436	Plate 6	F05	324	19	6.22951	0.420185
311	Plate 2 Duplex 1	D20	RNF114	55905	19923549	NM_018683	Plate 6	F06	202	8	4.12371	-0.775158
312	Plate 2 Duplex 1	H15	WHSC1L1	54904	13699812	NM_017778	Plate 6	F07	233	7	3.09735	-1.35777
313	Plate 2 Duplex 1	H17	MARCH2	51257	53729333	NM_001005416	Plate 6	F08	298	12	4.1958	-0.734235
314	Plate 2 Duplex 1	H19	CALCOCO2	10241	33519473	NM_005831	Plate 6	F09	236	13	5.8296	0.193177
315	Plate 2 Duplex 1	I18	CBLC	23624	195927029	NM_001130852	Plate 6	F10	115	8	7.47664	1.12811
316	Plate 2 Duplex 1	O14	TRIM6	117854	51477693	NM_058166	Plate 6	G02	164	10	6.49351	0.570042
317	Plate 2 Duplex 1	E15	RNF122	79845	38045930	NM_024787	Plate 6	G03	258	8	3.2	-1.2995
318	Plate 2 Duplex 1	E17	RNF39	80352	25777714	NM_025236	Plate 6	G04	212	15	7.61421	1.2062
319	Plate 2 Duplex 1	E19	RLIM	51132	34452683	NM_016120	Plate 6	G05	197	11	5.91398	0.241076
320	Plate 2 Duplex 1	H16	TRIM33	51592	74027250	NM_033020	Plate 6	G06	295	11	3.87324	-0.917337
321	Plate 2 Duplex 1	H18	RC3H2	54542	156105698	NM_018835	Plate 6	G07	284	19	7.16981	0.953942
322	Plate 2 Duplex 1	H20	RNF222	643904	89041178	XM_927169	Plate 6	G08	359	16	4.66472	-0.468056
323	Plate 2 Duplex 1	I20	RNF44	22838	37588862	NM_014901	Plate 6	G10	251	14	5.90717	0.237213
324	Plate 2 Duplex 1	J15	LONRF1	91694	87080812	NM_152271	Plate 7	B02	281	13	4.85075	-0.708561
325	Plate 2 Duplex 1	K15	RNF40	9810	37588854	NM_014771	Plate 7	B03	271	14	5.44747	-0.379024
326	Plate 2 Duplex 1	K17	RNF20	56254	34878776	NM_019592	Plate 7	B04	367	17	4.85714	-0.705028
327	Plate 2 Duplex 1	K19	PHF14	9678	55769549	NM_001007157	Plate 7	B05	407	32	8.53333	1.32512
328	Plate 2 Duplex 1	N16	SH3RF1	57630	89142742	NM_020870	Plate 7	B06	241	10	4.329	-0.996689
329	Plate 2 Duplex 1	N18	RING1	6015	51479191	NM_002931	Plate 7	B07	337	21	6.64557	0.282616
330	Plate 2 Duplex 1	N20	FSD1L	83856	89886461	NM_031919	Plate 7	B08	276	25	9.96016	2.11307
331	Plate 2 Duplex 1	O15	DPF3	8110	148762957	NM_012074	Plate 7	B09	273	13	5	-0.626137
332	Plate 2 Duplex 1	O17	RC3H1	149041	157841163	NM_172071	Plate 7	B10	246	22	9.82143	2.03646
333	Plate 2 Duplex 1	O19	RNF128	79589	37588870	NM_024539	Plate 7	B11	264	17	6.88259	0.413509
334	Plate 2 Duplex 1	J17	TRIM55	84675	34878851	NM_184087	Plate 7	C02	341	17	5.24691	-0.489781
335	Plate 2 Duplex 1	K16	TRIM35	23087	94536781	NM_171982	Plate 7	C03	251	5	2.03252	-2.2649
336	Plate 2 Duplex 1	L15	TRIM56	81844	30794215	NM_030961	Plate 7	C04	320	21	7.02341	0.491276
337	Plate 2 Duplex 1	L17	RNF167	26001	14149701	NM_015528	Plate 7	C05	367	16	4.5584	-0.870004
338	Plate 2 Duplex 1	L19	LONRF2	164832	148528974	NM_198461	Plate 7	C06	345	24	7.47664	0.741566
339	Plate 2 Duplex 1	O16	ANAPC11	51529	50409795	NM_001002245	Plate 7	C08	269	15	5.90551	-0.126075
340	Plate 2 Duplex 1	O18	MARCH9	92979	53759067	NM_138396	Plate 7	C09	279	10	3.71747	-1.3344
341	Plate 2 Duplex 1	O20	MKRN2	23609	32880198	NM_014160	Plate 7	C10	325	17	5.51948	-0.339258
342	Plate 2 Duplex 1	J19	BRPF3	27154	148727367	NM_015695	Plate 7	D02	435	29	7.14286	0.557239
343	Plate 2 Duplex 1	K18	CNOT4	4850	56550058	NM_001008225	Plate 7	D03	339	16	4.95356	-0.651783
344	Plate 2 Duplex 1	L16	RNF219	79596	88759347	NM_024546	Plate 7	D05	284	19	7.16981	0.572124
345	Plate 2 Duplex 1	L18	TRIM73	375593	65285120	NM_198924	Plate 7	D06	294	13	4.62633	-0.83249
346	Plate 2 Duplex 1	L20	RNF144B	255488	50284695	NM_182757	Plate 7	D07	273	13	5	-0.626137
347	Plate 2 Duplex 1	B22	NEURL3	93082	550822414	NM_001285485	Plate 7	D08	255	17	7.14286	0.557239
348	Plate 2 Duplex 1	D22	RNF185	91445	31542782	NM_152267	Plate 7	D09	304	21	7.42049	0.710562
349	Plate 2 Duplex 1	F22	ZFAND6	54469	21359917	NM_019006	Plate 7	D10	297	17	6.07143	-0.0344488
350	Plate 2 Duplex 1	J16	UBE4A	9354	38327028	NM_004788	Plate 7	E02	334	16	5.03145	-0.608771
351	Plate 2 Duplex 1	K20	RFPL3	10738	149408133	NM_006604	Plate 7	E03	343	23	7.1875	0.581893
352	Plate 2 Duplex 1	M15	UBR3	130507	160948609	NM_172070	Plate 7	E04	415	17	4.27136	-1.02852
353	Plate 2 Duplex 1	M17	ISL1	3670	115387113	NM_002202	Plate 7	E05	308	25	8.83392	1.49112
354	Plate 2 Duplex 1	M19	VPS18	57617	42544225	NM_020857	Plate 7	E06	240	18	8.10811	1.09029
355	Plate 2 Duplex 1	C22	CBL	867	52426744	NM_005188	Plate 7	E07	289	20	7.43494	0.718542
356	Plate 2 Duplex 1	E22	RBCK1	10616	144953899	NM_006462	Plate 7	E08	240	11	4.80349	-0.734656
357	Plate 2 Duplex 1	G22	RUFY1	80230	94721329	NM_001040452	Plate 7	E09	346	12	3.59281	-1.40324
358	Plate 2 Duplex 1	J18	DTX3	196403	31341899	NM_178502	Plate 7	F02	474	26	5.80357	-0.182371
359	Plate 2 Duplex 1	M16	TRIM49B	283116	113422339	XM_208043	Plate 7	F04	499	31	6.62393	0.270667
360	Plate 2 Duplex 1	M18	TRAF6	7189	22027628	NM_004620	Plate 7	F05	384	32	9.09091	1.63304
361	Plate 2 Duplex 1	M20	RNF2	6045	54792140	NM_007212	Plate 7	F06	387	20	5.44959	-0.377853
362	Plate 2 Duplex 1	B21	FBXW5	54461	30749199	NM_018998	Plate 7	F07	339	18	5.60748	-0.290663
363	Plate 2 Duplex 1	D21	MID2	11043	16445407	NM_012216	Plate 7	F08	331	21	6.77419	0.353648
364	Plate 2 Duplex 1	F21	OIT3	170392	22749296	NM_152635	Plate 7	F09	298	18	6.42857	0.162781
365	Plate 2 Duplex 1	J20	AMFR	267	85815824	NM_001144	Plate 7	G02	470	16	3.52423	-1.44112
366	Plate 2 Duplex 1	N15	TRIM71	131405	84993741	NM_001039111	Plate 7	G03	310	15	5.08475	-0.579336
367	Plate 2 Duplex 1	N17	SH3RF3	344558	150010571	NM_001099289	Plate 7	G04	323	21	6.95364	0.452747
368	Plate 2 Duplex 1	N19	TTC3	7267	21359840	NM_003316	Plate 7	G05	416	23	5.85242	-0.155396
369	Plate 2 Duplex 1	C21	RNF32	140545	37595535	NM_030936	Plate 7	G06	379	21	5.86592	-0.147938
370	Plate 2 Duplex 1	E21	RNF135	84282	37655168	NM_197939	Plate 7	G07	314	12	3.97351	-1.19301
371	Plate 2 Duplex 1	G21	HR	55806	70906481	NM_018411	Plate 7	G08	308	30	10.7914	2.5721
372	Plate 2 Duplex 1	H22	TRIM40	135644	156523274	NM_138700	Plate 8	B02	260	19	7.88382	1.0487
373	Plate 2 Duplex 1	J22	SCEL	8796	21536305	NM_003843	Plate 8	B03	225	16	7.6555	0.91599
374	Plate 2 Duplex 1	L22	PPIL2	23759	148271091	NM_148176	Plate 8	B04	298	16	5.67376	-0.235955
375	Plate 2 Duplex 1	N22	RAG1	5896	4557840	NM_000448	Plate 8	B05	166	5	3.10559	-1.72878
376	Plate 2 Duplex 1	I22	KMT2C	58508	91718901	NM_170606	Plate 8	B07	815	56	7.37813	0.754759
377	Plate 2 Duplex 1	K22	CHD4	1108	51599155	NM_001273	Plate 8	B08	249	11	4.62185	-0.847408
378	Plate 2 Duplex 1	M22	PEX2	5828	121114289	NM_001079867	Plate 8	B09	271	21	8.4	1.34875
379	Plate 2 Duplex 1	O22	RNFT1	51136	109134326	NM_016125	Plate 8	B10	303	18	6.31579	0.137244
380	Plate 3 Duplex 1	B22	TRIM32	22954	153791513	NM_001099679	Plate 8	C03	347	30	9.46372	1.96707
381	Plate 2 Duplex 1	H21	UBR2	23304	27597060	NM_015255	Plate 8	C04	185	7	3.93258	-1.24806
382	Plate 2 Duplex 1	J21	RFFL	117584	62865648	NM_001017368	Plate 8	C05	288	14	5.10949	-0.563953
383	Plate 2 Duplex 1	L21	TRIM64B	642446	256542274	NM_001164397	Plate 8	C06	214	6	2.88462	-1.85722
384	Plate 2 Duplex 1	I21	RAD18	56852	14550404	NM_020165	Plate 8	C08	286	15	5.53506	-0.31658
385	Plate 2 Duplex 1	K21	RFPL4AL1	729974	113428354	XM_001131933	Plate 8	C09	240	12	5.26316	-0.474629
386	Plate 2 Duplex 1	M21	PDZRN4	29951	142976782	NM_013377	Plate 8	C10	315	15	5	-0.627597
387	Plate 2 Duplex 1	O21	NSD1	64324	27477093	NM_022455	Plate 8	C11	400	22	5.82011	-0.150887
388	Plate 3 Duplex 1	B21	TRIM45	80263	50878292	NM_025188	Plate 8	D02	382	14	3.80435	-1.3226
389	Plate 3 Duplex 1	D22	RNF175	285533	148664182	NM_173662	Plate 8	D03	260	23	9.70464	2.10711
390	Plate 3 Duplex 1	C21	RNF217	154214	34303935	NM_152553	Plate 8	D04	320	22	7.38255	0.757329
391	Plate 1 Duplex 1	H22	CUL1	8454	32307160	NM_003592	Plate 8	D05	272	15	5.83658	-0.141313
392	Plate 1 Duplex 1	J22	UBE2G1	7326	75992937	NM_003342	Plate 8	D06	274	14	5.38462	-0.404028
393	Plate 1 Duplex 1	L22	LRRC29	26231	51873033	NM_001004055	Plate 8	D07	748	48	6.85714	0.451921
394	Plate 1 Duplex 1	N22	FBXO45	200933	157743246	NM_001105573	Plate 8	D08	315	22	7.50853	0.83056
395	Plate 3 Duplex 1	D21	ARIH1	25820	9966762	NM_005744	Plate 8	E02	216	10	4.85437	-0.712249
396	Plate 3 Duplex 1	F22	RNF187	149603	113411744	XM_928029	Plate 8	E03	329	20	6.47249	0.228331
397	Plate 3 Duplex 1	E21	PML	5371	67089153	NM_033247	Plate 8	E04	245	18	7.92952	1.07527
398	Plate 1 Duplex 1	I22	UBE2E3	10477	33359695	NM_006357	Plate 8	E06	372	14	3.91061	-1.26083
399	Plate 1 Duplex 1	K22	SOCS6	9306	118402588	NM_004232	Plate 8	E07	898	63	7.54491	0.851705
400	Plate 1 Duplex 1	M22	FBXO16	157574	30089920	NM_172366	Plate 8	E08	319	20	6.68896	0.354162
401	Plate 1 Duplex 1	O22	ASB15	142685	92087059	NM_080928	Plate 8	E09	263	12	4.78088	-0.754969
402	Plate 3 Duplex 1	F21	RNF208	727800	119220602	NM_031297	Plate 8	F02	379	15	4.12088	-1.13861
403	Plate 3 Duplex 1	C22	RNF186	54546	9506662	NM_019062	Plate 8	F04	451	30	7.12589	0.608138
404	Plate 1 Duplex 1	H21	ITCH	83737	27477108	NM_031483	Plate 8	F05	312	21	7.21649	0.660805
405	Plate 1 Duplex 1	J21	TMEM189-UBE2V1	387522	241982736	NM_199203	Plate 8	F06	308	15	5.11945	-0.558161
406	Plate 1 Duplex 1	L21	FBXL8	55336	22547145	NM_018378	Plate 8	F07	678	47	7.44849	0.795661
407	Plate 1 Duplex 1	N21	FBXW11	23291	48928047	NM_033645	Plate 8	F08	235	6	2.62009	-2.01099
408	Plate 3 Duplex 1	E22	UBOX5	22888	40806195	NM_199415	Plate 8	G04	377	27	7.71429	0.95016
409	Plate 1 Duplex 1	I21	UBE2V1	7335	73765545	NM_001032288	Plate 8	G05	360	17	4.95627	-0.653017
410	Plate 1 Duplex 1	K21	ASB13	79754	22208956	NM_024701	Plate 8	G06	351	20	6.0423	-0.0217322
411	Plate 1 Duplex 1	M21	ASB9	140462	13443013	NM_024087	Plate 8	G07	767	55	7.72472	0.956224
412	Plate 1 Duplex 1	O21	FBXL6	26233	61742135	NM_024555	Plate 8	G08	296	18	6.47482	0.229685
413	Plate 1 Duplex 1	B03	USP17L9P	391627	157785652	NM_001105662	Plate 9	B02	131	11	9.16667	2.09578
414	Plate 1 Duplex 1	C03	USP30	84749	34147434	NM_032663	Plate 9	B03	194	10	5.43478	0.168727
415	Plate 1 Duplex 1	C05	USP3	9960	55770885	NM_006537	Plate 9	B04	182	12	7.05882	1.00734
416	Plate 1 Duplex 1	C07	BRCC3	79184	64762482	NM_024332	Plate 9	B05	267	15	5.95238	0.436001
417	Plate 1 Duplex 1	F04	LOC402164	402164	88979613	XM_939510	Plate 9	B06	169	7	4.32099	-0.406409
418	Plate 1 Duplex 1	F06	OTUD5	55593	40353201	NM_017602	Plate 9	B07	274	15	5.79151	0.35293
419	Plate 1 Duplex 1	F08	BAP1	8314	19718752	NM_004656	Plate 9	B08	105	7	7.14286	1.05073
420	Plate 1 Duplex 1	G03	UBR5	51366	41352716	NM_015902	Plate 9	B09	224	10	4.6729	-0.224691
421	Plate 1 Duplex 1	G05	UBE2K	3093	163660386	NM_001111113	Plate 9	B10	209	12	6.09137	0.507772
422	Plate 1 Duplex 1	B05	USP39	10713	56550050	NM_006590	Plate 9	C02	246	13	5.5794	0.243403
423	Plate 1 Duplex 1	C04	MPND	84954	141802427	NM_032868	Plate 9	C03	197	13	7.06522	1.01064
424	Plate 1 Duplex 1	D03	OTUB2	78990	156071517	NM_023112	Plate 9	C04	244	10	4.2735	-0.430928
425	Plate 1 Duplex 1	D05	UBL4A	8266	145386555	NM_014235	Plate 9	C05	213	16	8.12183	1.55625
426	Plate 1 Duplex 1	D07	STAMBPL1	57559	52694663	NM_020799	Plate 9	C06	207	9	4.54545	-0.2905
427	Plate 1 Duplex 1	G04	UBE2V2	7336	12025664	NM_003350	Plate 9	C08	257	16	6.639	0.790556
428	Plate 1 Duplex 1	G06	DCUN1D5	84259	34147410	NM_032299	Plate 9	C09	218	10	4.80769	-0.155087
429	Plate 1 Duplex 1	G08	HERC2	8924	126032347	NM_004667	Plate 9	C10	166	9	5.73248	0.322452
430	Plate 1 Duplex 1	J03	UBE2D1	7321	33149307	NM_003338	Plate 9	C11	209	10	5.02513	-0.0428096
431	Plate 1 Duplex 1	B07	USP43	124739	148612810	NM_153210	Plate 9	D02	259	13	5.28455	0.091152
432	Plate 1 Duplex 1	C06	USP9X	8239	145309310	NM_001039591	Plate 9	D03	352	24	7.31707	1.14069
433	Plate 1 Duplex 1	D04	FBXO7	25793	74229028	NM_001033024	Plate 9	D05	232	5	2.20264	-1.50027
434	Plate 1 Duplex 1	D06	USP7	7874	150378532	NM_003470	Plate 9	D06	218	18	9	2.00971
435	Plate 1 Duplex 1	D08	USPL1	10208	34222300	NM_005800	Plate 9	D07	168	3	1.81818	-1.69879
436	Plate 1 Duplex 1	H03	UBE2J2	118424	37577129	NM_194457	Plate 9	D08	166	8	5.06329	-0.0231019
437	Plate 1 Duplex 1	H05	HECW1	23072	94536810	NM_015052	Plate 9	D09	207	14	7.25389	1.10807
438	Plate 1 Duplex 1	H07	UBA7	7318	38045947	NM_003335	Plate 9	D10	187	6	3.31492	-0.925918
439	Plate 1 Duplex 1	J05	UBE3A	7337	19718765	NM_000462	Plate 9	D11	217	10	4.83092	-0.143094
440	Plate 1 Duplex 1	B04	USP26	83844	13994267	NM_031907	Plate 9	E02	310	11	3.67893	-0.737951
441	Plate 1 Duplex 1	C08	UBL3	5412	40254846	NM_007106	Plate 9	E03	563	54	10.609	2.84058
442	Plate 1 Duplex 1	E03	UBR1	197131	83656781	NM_174916	Plate 9	E04	186	10	5.68182	0.29629
443	Plate 1 Duplex 1	E05	USP54	159195	124001557	NM_152586	Plate 9	E05	349	19	5.75758	0.335409
444	Plate 1 Duplex 1	E07	UCHL5	51377	108796054	NM_015984	Plate 9	E06	390	21	5.69106	0.30106
445	Plate 1 Duplex 1	H04	HUWE1	10075	61676187	NM_031407	Plate 9	E07	181	7	4.02299	-0.560288
446	Plate 1 Duplex 1	H06	CAND2	23066	112420976	NM_012298	Plate 9	E08	223	7	3.24074	-0.964221
447	Plate 1 Duplex 1	H08	UBE2D3	7323	33149323	NM_181893	Plate 9	E09	201	9	4.6875	-0.217151
448	Plate 1 Duplex 1	J04	CAND1	55832	21361793	NM_018448	Plate 9	E10	175	7	4.16667	-0.486096
449	Plate 1 Duplex 1	J07	TRIP12	9320	10863902	NM_004238	Plate 9	E11	187	7	3.88889	-0.629533
450	Plate 1 Duplex 1	B06	USP34	9736	110347426	NM_014709	Plate 9	F02	408	10	2.51256	-1.34023
451	Plate 1 Duplex 1	E04	FBXO8	26269	48928043	NM_012180	Plate 9	F04	182	5	2.82486	-1.17897
452	Plate 1 Duplex 1	E06	UFD1L	7353	78214517	NM_001035247	Plate 9	F05	252	5	2.02429	-1.59236
453	Plate 1 Duplex 1	E08	USP17L2	377630	153792149	NM_201402	Plate 9	F06	342	24	7.54717	1.25951
454	Plate 1 Duplex 1	I03	UBE3B	89910	35493958	NM_130466	Plate 9	F07	253	12	4.97925	-0.066497
455	Plate 1 Duplex 1	I05	UBE2A	7319	32967279	NM_003336	Plate 9	F08	224	5	2.28311	-1.45872
456	Plate 1 Duplex 1	I07	UBE2E2	7325	142378343	NM_152653	Plate 9	F09	278	13	4.90566	-0.104498
457	Plate 1 Duplex 1	J06	AREL1	9870	87116667	NM_001039479	Plate 9	F10	204	14	7.36842	1.16721
458	Plate 1 Duplex 1	B08	USP27X	389856	51477634	XM_372213	Plate 9	G02	383	18	4.93151	-0.091152
459	Plate 1 Duplex 1	F03	JOSD2	126119	142354717	NM_138334	Plate 9	G03	327	11	3.48101	-0.84015
460	Plate 1 Duplex 1	F05	USP10	9100	119220604	NM_005153	Plate 9	G04	346	12	3.59281	-0.782419
461	Plate 1 Duplex 1	F07	USP5	8078	148727246	NM_003481	Plate 9	G05	342	19	5.88235	0.399841
462	Plate 1 Duplex 1	I04	UBE2R2	54926	58530887	NM_017811	Plate 9	G06	214	9	4.39024	-0.370646
463	Plate 1 Duplex 1	I06	AKTIP	64400	61743931	NM_022476	Plate 9	G07	296	11	3.85965	-0.644632
464	Plate 1 Duplex 1	I08	UBE2E1	7324	33359692	NM_003341	Plate 9	G08	253	4	1.60643	-1.80814
465	Plate 1 Duplex 1	J08	UBE2D4	51619	19549332	NM_015983	Plate 9	G10	230	8	3.6036	-0.776847
466	Plate 1 Duplex 1	K03	UBE2H	7328	33356153	NM_182697	Plate 10	B02	184	11	6.35838	1.11151
467	Plate 1 Duplex 1	L03	FBXO6	26270	48995170	NM_018438	Plate 10	B03	365	23	6.72515	1.41044
468	Plate 1 Duplex 1	L05	FBXO9	26268	117190362	NM_012347	Plate 10	B04	430	25	6.17284	0.96029
469	Plate 1 Duplex 1	L07	FBXL21	26223	148922962	NM_012159	Plate 10	B05	361	22	6.48968	1.21852
470	Plate 1 Duplex 1	O04	FBXL4	26235	21536437	NM_012160	Plate 10	B06	266	11	4.31373	-0.554958
471	Plate 1 Duplex 1	O06	FBXW4	6468	63079686	NM_022039	Plate 10	B07	364	22	6.43275	1.17213
472	Plate 1 Duplex 1	O08	FBXO47	494188	56912188	NM_001008777	Plate 10	B08	355	13	3.80117	-0.972711
473	Plate 1 Duplex 1	B09	USP14	9097	82880644	NM_001037334	Plate 10	B09	309	15	5.10204	0.0875486
474	Plate 1 Duplex 1	B11	PAN2	9924	7662257	NM_014871	Plate 10	B10	388	19	5.14905	0.125864
475	Plate 1 Duplex 1	B13	USP18	11274	156071510	NM_017414	Plate 10	B11	183	8	4.57143	-0.344921
476	Plate 1 Duplex 1	K05	CUL5	8065	67514034	NM_003478	Plate 10	C02	361	17	4.94186	-0.0430045
477	Plate 1 Duplex 1	L04	ASB16	92591	24586687	NM_080863	Plate 10	C03	416	19	4.78589	-0.170123
478	Plate 1 Duplex 1	M03	FBXW8	26259	30795120	NM_012174	Plate 10	C04	294	18	6.52174	1.24466
479	Plate 1 Duplex 1	M05	FBXO41	150726	122937218	NM_001080410	Plate 10	C05	390	22	5.97826	0.801701
480	Plate 1 Duplex 1	M07	SOCS5	9655	21618352	NM_014011	Plate 10	C06	324	13	4.18006	-0.663897
481	Plate 1 Duplex 1	B10	ZRANB1	54764	110815808	NM_017580	Plate 10	C08	316	14	4.63576	-0.292487
482	Plate 1 Duplex 1	B12	USP22	23326	150010638	NM_015276	Plate 10	C09	334	17	5.36278	0.300058
483	Plate 1 Duplex 1	B14	UBTD1	80019	34222339	NM_024954	Plate 10	C10	312	14	4.69799	-0.241771
484	Plate 1 Duplex 1	E09	OTUD4	54726	32307178	NM_017493	Plate 10	C11	320	23	7.74411	2.24093
485	Plate 1 Duplex 1	K07	ARIH1	25820	9966762	NM_005744	Plate 10	D02	496	18	3.76569	-1.00163
486	Plate 1 Duplex 1	L06	SPSB2	84727	14249177	NM_032641	Plate 10	D03	412	26	6.73575	1.41908
487	Plate 1 Duplex 1	M04	FBXO4	26272	51093871	NM_012176	Plate 10	D05	361	14	4.03458	-0.782471
488	Plate 1 Duplex 1	M06	FBXL13	222235	161333853	NM_001111038	Plate 10	D06	306	20	6.99301	1.62876
489	Plate 1 Duplex 1	M08	ASB11	140456	60218886	NM_001012428	Plate 10	D07	357	16	4.69208	-0.246583
490	Plate 1 Duplex 1	C09	USP12	219333	32698814	NM_182488	Plate 10	D08	364	24	7.05882	1.6824
491	Plate 1 Duplex 1	C11	USP32	84669	44889413	NM_032582	Plate 10	D09	345	17	5.18293	0.153474
492	Plate 1 Duplex 1	C13	USP38	84640	31559774	NM_032557	Plate 10	D10	355	9	2.60116	-1.95077
493	Plate 1 Duplex 1	E11	OTUB1	55611	109148507	NM_017670	Plate 10	D11	338	20	6.28931	1.05522
494	Plate 1 Duplex 1	K04	SPSB1	80176	18141315	NM_025106	Plate 10	E02	488	20	4.2735	-0.58774
495	Plate 1 Duplex 1	L08	PAAF1	80227	13376750	NM_025155	Plate 10	E03	404	15	3.85604	-0.927989
496	Plate 1 Duplex 1	N03	ASB14	142686	28559001	NM_130387	Plate 10	E04	416	16	4	-0.810657
497	Plate 1 Duplex 1	N05	FBXO5	26271	15812190	NM_012177	Plate 10	E05	299	12	4.18118	-0.662984
498	Plate 1 Duplex 1	N07	FBXL17	64839	45238579	NM_022824	Plate 10	E06	357	21	6.25	1.02318
499	Plate 1 Duplex 1	C10	UEVLD	55293	103472014	NM_018314	Plate 10	E07	365	16	4.58453	-0.334245
500	Plate 1 Duplex 1	C12	UCK2	7371	20357519	NM_012474	Plate 10	E08	352	14	4.14201	-0.694912
501	Plate 1 Duplex 1	C14	CYLD	1540	109637773	NM_001042355	Plate 10	E09	318	15	4.9505	-0.035967
502	Plate 1 Duplex 1	E10	USP33	23032	21489974	NM_015017	Plate 10	E10	328	9	2.82132	-1.77133
503	Plate 1 Duplex 1	E13	USP45	85015	122937411	NM_001080481	Plate 10	E11	324	17	5.53746	0.442431
504	Plate 1 Duplex 1	K06	SPSB3	90864	38679885	NM_080861	Plate 10	F02	435	22	5.32688	0.270798
505	Plate 1 Duplex 1	N04	ASB6	140459	30089933	NM_017873	Plate 10	F04	320	12	3.8961	-0.895336
506	Plate 1 Duplex 1	N06	FBXO28	23219	7662157	NM_015176	Plate 10	F05	413	22	5.6266	0.515083
507	Plate 1 Duplex 1	N08	FBXO46	23403	122937334	NM_001080469	Plate 10	F06	335	11	3.39506	-1.3037
508	Plate 1 Duplex 1	D09	USP11	8237	75992939	NM_004651	Plate 10	F07	466	18	4.01786	-0.796102
509	Plate 1 Duplex 1	D11	UCHL3	7347	37059734	NM_006002	Plate 10	F08	298	12	4.1958	-0.651069
510	Plate 1 Duplex 1	D13	USP16	10600	50312663	NM_001001992	Plate 10	F09	353	15	4.43787	-0.453776
511	Plate 1 Duplex 1	E12	USP9Y	8287	74319832	NM_004654	Plate 10	F10	429	27	6.71642	1.40333
512	Plate 1 Duplex 1	K08	FBXO31	79791	21362004	NM_024735	Plate 10	G02	439	10	2.331	-2.17095
513	Plate 1 Duplex 1	O03	RAB40C	57799	18373307	NM_021168	Plate 10	G03	474	20	4.40529	-0.480333
514	Plate 1 Duplex 1	O05	FBXW2	26190	118402583	NM_012164	Plate 10	G04	422	21	5.23691	0.19747
515	Plate 1 Duplex 1	O07	NCCRP1	342897	47825360	NM_001001414	Plate 10	G05	357	17	5	0.00438144
516	Plate 1 Duplex 1	D10	USP21	27005	21265127	NM_012475	Plate 10	G06	472	18	3.96476	-0.83938
517	Plate 1 Duplex 1	D12	USP51	158880	69885216	NM_201286	Plate 10	G07	360	16	4.65116	-0.279934
518	Plate 1 Duplex 1	D14	USP6	9098	109638750	NM_004505	Plate 10	G08	404	26	6.87831	1.53527
519	Plate 1 Duplex 1	E14	YOD1	55432	62751963	NM_018566	Plate 10	G10	335	12	3.71517	-1.0428
520	Plate 1 Duplex 1	F09	USP29	57663	56790915	NM_020903	Plate 11	B02	221	12	5.74163	-0.456486
521	Plate 1 Duplex 1	G09	UBE2T	29089	142369556	NM_014176	Plate 11	B03	375	33	9.64912	1.79473
522	Plate 1 Duplex 1	G11	CDC34	997	16357476	NM_004359	Plate 11	B04	435	25	6.09756	-0.251422
523	Plate 1 Duplex 1	G13	HECTD4	283450	157885805	NM_001109662	Plate 11	B05	311	30	10.6762	2.38644
524	Plate 1 Duplex 1	J10	DCUN1D4	23142	94536779	NM_015115	Plate 11	B06	399	26	6.97051	0.251508
525	Plate 1 Duplex 1	J12	CUL4B	8450	121114301	NM_001079872	Plate 11	B07	327	26	8.63787	1.21212
526	Plate 1 Duplex 1	J14	UBE2L6	9246	38157980	NM_004223	Plate 11	B08	295	18	6.49819	-0.0206055
527	Plate 1 Duplex 1	K09	UBE2D2	7322	33188457	NM_003339	Plate 11	B09	253	18	7.65957	0.648498
528	Plate 1 Duplex 1	K11	CACUL1	143384	109452596	NM_153810	Plate 11	B10	234	21	9.85915	1.91574
529	Plate 1 Duplex 1	K13	UBA6	55236	150417995	NM_018227	Plate 11	B11	279	11	4.10448	-1.39969
530	Plate 1 Duplex 1	F11	VCPIP1	80124	156071521	NM_025054	Plate 11	C02	453	25	5.84112	-0.399164
531	Plate 1 Duplex 1	G10	UBE2N	7334	37577134	NM_003348	Plate 11	C03	371	21	6	-0.30763
532	Plate 1 Duplex 1	H09	UBA1	7317	163659921	NM_153280	Plate 11	C04	350	18	5.42169	-0.640812
533	Plate 1 Duplex 1	H11	HERC1	8925	126131098	NM_003922	Plate 11	C05	332	19	6.07029	-0.267135
534	Plate 1 Duplex 1	H13	HACE1	57531	116875851	NM_020771	Plate 11	C06	288	19	7.0632	0.304908
535	Plate 1 Duplex 1	K10	SOCS3	9021	45439351	NM_003955	Plate 11	C08	326	24	7.94702	0.814103
536	Plate 1 Duplex 1	K12	FBXO15	201456	22749362	NM_152676	Plate 11	C09	237	12	5.33333	-0.691715
537	Plate 1 Duplex 1	K14	NLRC5	84166	28951070	NM_032206	Plate 11	C10	248	13	5.53191	-0.577307
538	Plate 1 Duplex 1	N09	ASB5	140458	22208965	NM_080874	Plate 11	C11	179	10	5.91716	-0.355356
539	Plate 1 Duplex 1	F13	USP2	9099	28565284	NM_171997	Plate 11	D02	447	28	6.68258	0.0856225
540	Plate 1 Duplex 1	G12	UBE2Z	65264	150417998	NM_023079	Plate 11	D03	357	23	6.88623	0.202951
541	Plate 1 Duplex 1	H10	NEDD4	4734	114520608	NM_006154	Plate 11	D05	331	24	7.81759	0.739535
542	Plate 1 Duplex 1	H12	UBA5	79876	163659923	NM_198329	Plate 11	D06	274	16	6.20155	-0.191511
543	Plate 1 Duplex 1	H14	UBE2M	9040	150417997	NM_003969	Plate 11	D07	278	17	6.51341	-0.0118397
544	Plate 1 Duplex 1	L09	FBXO3	26273	48928041	NM_012175	Plate 11	D08	245	13	5.60345	-0.536094
545	Plate 1 Duplex 1	L11	FBXO22	26263	22547147	NM_012170	Plate 11	D09	175	15	9.375	1.6368
546	Plate 1 Duplex 1	L13	CCNF	899	118572587	NM_001761	Plate 11	D10	260	16	6.55738	0.0134909
547	Plate 1 Duplex 1	N11	CISH	1154	21614506	NM_145071	Plate 11	D11	290	15	5.45455	-0.621881
548	Plate 1 Duplex 1	F10	UBTD2	92181	109659840	NM_152277	Plate 11	E02	459	28	6.49652	-0.0215707
549	Plate 1 Duplex 1	G14	UBE2L3	7332	38157977	NM_003347	Plate 11	E03	455	25	5.81395	-0.414816
550	Plate 1 Duplex 1	I09	HECTD3	79654	157738608	NM_024602	Plate 11	E04	364	24	7.05882	0.302388
551	Plate 1 Duplex 1	I11	UBE2I	7329	35493970	NM_003345	Plate 11	E05	361	17	4.94186	-0.917254
552	Plate 1 Duplex 1	I13	UBE2Q2	92912	29789400	NM_173469	Plate 11	E06	258	19	7.94979	0.8157
553	Plate 1 Duplex 1	L10	FBXO11	80204	30089921	NM_012167	Plate 11	E07	291	18	6.59341	0.0342486
554	Plate 1 Duplex 1	L12	FBXL14	144699	22748930	NM_152441	Plate 11	E08	303	21	7.44681	0.525917
555	Plate 1 Duplex 1	L14	RAB40AL	282808	73611939	NM_001031834	Plate 11	E09	233	5	2.19298	-2.50096
556	Plate 1 Duplex 1	N10	ASB8	140461	45333920	NM_024095	Plate 11	E10	210	5	2.43902	-2.35921
557	Plate 1 Duplex 1	N13	BTRC	8945	156071488	NM_003939	Plate 11	E11	221	9	4.24528	-1.31857
558	Plate 1 Duplex 1	F12	USP19	10869	57529245	NM_006677	Plate 11	F02	402	28	7.48663	0.54886
559	Plate 1 Duplex 1	I10	UBE3C	9690	7661855	NM_014671	Plate 11	F04	481	21	4.56522	-1.13425
560	Plate 1 Duplex 1	I12	TSG101	7251	18765712	NM_006292	Plate 11	F05	362	30	9.03614	1.44158
561	Plate 1 Duplex 1	I14	UBE2G2	7327	33359699	NM_003343	Plate 11	F06	306	21	7.36842	0.480756
562	Plate 1 Duplex 1	M09	FBXO7	25793	74229028	NM_001033024	Plate 11	F07	278	18	6.92308	0.224181
563	Plate 1 Duplex 1	M11	FBXO25	26260	34878756	NM_012173	Plate 11	F08	208	7	3.48259	-1.75798
564	Plate 1 Duplex 1	M13	FBXO24	26261	91807114	NM_012172	Plate 11	F09	275	13	4.96183	-0.905747
565	Plate 1 Duplex 1	N12	FBXW9	84261	124248557	NM_032301	Plate 11	F10	224	12	5.66038	-0.503296
566	Plate 1 Duplex 1	F14	COPS5	10987	38027922	NM_006837	Plate 11	G02	408	30	7.93651	0.808047
567	Plate 1 Duplex 1	J09	HECTD2	143279	27735098	NM_173497	Plate 11	G03	428	34	8.62944	1.20727
568	Plate 1 Duplex 1	J11	CUL4A	8451	57165422	NM_003589	Plate 11	G04	426	32	8.12183	0.914815
569	Plate 1 Duplex 1	J13	HERC4	26091	145386582	NM_015601	Plate 11	G05	350	24	7.36196	0.477036
570	Plate 1 Duplex 1	M10	RAB40A	142684	56550076	NM_080879	Plate 11	G06	326	25	8.30565	1.02072
571	Plate 1 Duplex 1	M12	FBXL2	25827	16306581	NM_012157	Plate 11	G07	313	16	5.38721	-0.660678
572	Plate 1 Duplex 1	M14	FBXO2	26232	48995171	NM_012168	Plate 11	G08	226	10	4.62963	-1.09714
573	Plate 1 Duplex 1	N14	FBXL12	54850	8923178	NM_017703	Plate 11	G10	223	12	5.6872	-0.48784
574	Plate 1 Duplex 1	O09	FBXL18	80028	157426874	NM_024963	Plate 12	B02	107	4	3.8835	-0.656582
575	Plate 1 Duplex 1	B15	USP31	57478	120587026	NM_020718	Plate 12	B03	212	12	6	0.0929027
576	Plate 1 Duplex 1	B17	USP42	84132	134948692	NM_032172	Plate 12	B04	322	16	5.22876	-0.180205
577	Plate 1 Duplex 1	B19	PSMD14	10213	5031980	NM_005805	Plate 12	B05	145	3	2.11268	-1.28365
578	Plate 1 Duplex 1	E16	USP20	10868	160333578	NM_001110303	Plate 12	B06	207	8	4.0201	-0.608208
579	Plate 1 Duplex 1	E18	USP41	373856	113429506	XM_937988	Plate 12	B07	198	15	8.19672	0.870793
580	Plate 1 Duplex 1	E20	OTUD7A	161725	18702330	NM_130901	Plate 12	B08	229	18	8.53081	0.989098
581	Plate 1 Duplex 1	F15	MYSM1	114803	148227841	NM_001085487	Plate 12	B09	146	15	11.4504	2.02296
582	Plate 1 Duplex 1	F17	STAMBP	10617	42519911	NM_201647	Plate 12	B10	147	8	5.7554	0.00628472
583	Plate 1 Duplex 1	F19	USP8	9101	41281375	NM_005154	Plate 12	B11	103	7	7.29167	0.550301
584	Plate 1 Duplex 1	O11	TULP4	56995	55953101	NM_001007466	Plate 12	C02	214	16	8.08081	0.829747
585	Plate 1 Duplex 1	B16	UCHL1	7345	34147658	NM_004181	Plate 12	C03	254	36	16.5138	3.81598
586	Plate 1 Duplex 1	C15	USP46	64854	31377708	NM_022832	Plate 12	C04	267	22	8.97959	1.14802
587	Plate 1 Duplex 1	C17	OTUD6B	51633	157364936	NM_016023	Plate 12	C05	225	11	5.14019	-0.21157
588	Plate 1 Duplex 1	C19	USP53	54532	148539599	NM_019050	Plate 12	C06	196	5	2.6178	-1.10478
589	Plate 1 Duplex 1	F16	UBL5	59286	115387111	NM_001048241	Plate 12	C08	124	8	6.89655	0.410385
590	Plate 1 Duplex 1	F18	ATXN3	4287	130979667	NM_030660	Plate 12	C09	133	9	7.25806	0.538401
591	Plate 1 Duplex 1	F20	UBE2C	11065	32967290	NM_181803	Plate 12	C10	141	6	4.44444	-0.457942
592	Plate 1 Duplex 1	I15	HERC6	55008	61563741	NM_017912	Plate 12	C11	164	5	3.14465	-0.918217
593	Plate 1 Duplex 1	O13	FBXO8	26269	48928043	NM_012180	Plate 12	D02	226	16	7.61905	0.666231
594	Plate 1 Duplex 1	B18	OTUD7B	56957	118026941	NM_020205	Plate 12	D03	207	14	7.25389	0.536922
595	Plate 1 Duplex 1	C16	USP4	7375	40795664	NM_003363	Plate 12	D05	242	15	6.60793	0.308179
596	Plate 1 Duplex 1	C18	PARP11	57097	66348099	NM_020367	Plate 12	D06	174	8	4.81928	-0.325208
597	Plate 1 Duplex 1	C20	PRPF8	10594	91208425	NM_006445	Plate 12	D07	156	4	2.63158	-1.0999
598	Plate 1 Duplex 1	G15	DCUN1D1	54165	36030882	NM_020640	Plate 12	D08	146	8	5.7971	0.0210533
599	Plate 1 Duplex 1	G17	CUL2	8453	19482173	NM_003591	Plate 12	D09	117	4	3.53982	-0.778282
600	Plate 1 Duplex 1	G19	HERC3	8916	7657151	NM_014606	Plate 12	D10	146	7	5.03597	-0.248474
601	Plate 1 Duplex 1	I17	WWP1	11059	33946331	NM_007013	Plate 12	D11	128	1	0.787402	-1.75295
602	Plate 1 Duplex 1	O10	ASB17	127247	27477048	NM_080868	Plate 12	E02	231	14	6.45161	0.252825
603	Plate 1 Duplex 1	B20	USP25	29761	50312665	NM_013396	Plate 12	E03	221	16	7.80488	0.732036
604	Plate 1 Duplex 1	D15	TNFAIP3	7128	26051241	NM_006290	Plate 12	E04	201	17	9.23913	1.23993
605	Plate 1 Duplex 1	D17	USP49	25862	34147686	NM_018561	Plate 12	E05	284	22	8.39695	0.941696
606	Plate 1 Duplex 1	D19	USP15	9958	14149626	NM_006313	Plate 12	E06	233	9	4.01786	-0.609003
607	Plate 1 Duplex 1	G16	HERC5	51191	110825981	NM_016323	Plate 12	E07	211	11	5.5	-0.0841546
608	Plate 1 Duplex 1	G18	UBE2NL	389898	61175264	NM_001012989	Plate 12	E08	153	2	1.3245	-1.56276
609	Plate 1 Duplex 1	G20	DCUN1D3	123879	27735046	NM_173475	Plate 12	E09	121	7	6.14035	0.142603
610	Plate 1 Duplex 1	I16	SMURF2	64750	56550041	NM_022739	Plate 12	E10	129	5	4.03226	-0.603903
611	Plate 1 Duplex 1	I19	UBE2O	63893	33636749	NM_022066	Plate 12	E11	140	4	2.94118	-0.990271
612	Plate 1 Duplex 1	O12	ASB3	51130	22208952	NM_016115	Plate 12	F02	314	19	6.44068	0.248953
613	Plate 1 Duplex 1	D16	USP13	8975	4507848	NM_003940	Plate 12	F04	260	19	7.88382	0.75999
614	Plate 1 Duplex 1	D18	USP44	84101	109134333	NM_001042403	Plate 12	F05	252	24	10.5263	1.69574
615	Plate 1 Duplex 1	D20	USP24	23358	149192844	NM_015306	Plate 12	F06	210	13	6.59898	0.305012
616	Plate 1 Duplex 1	H15	CUL7	9820	31543014	NM_014780	Plate 12	F07	180	5	2.85714	-1.02003
617	Plate 1 Duplex 1	H17	UBE2S	27338	112382376	NM_014501	Plate 12	F08	159	12	8.16327	0.858946
618	Plate 1 Duplex 1	H19	CUL3	8452	45827792	NM_003590	Plate 12	F09	117	3	2.63158	-1.0999
619	Plate 1 Duplex 1	I18	NEDD4L	23327	141801823	NM_015277	Plate 12	F10	146	6	4.28571	-0.514151
620	Plate 1 Duplex 1	O14	FBXO44	93611	62388869	NM_183413	Plate 12	G02	251	10	4.14938	-0.56243
621	Plate 1 Duplex 1	E15	USP35	57558	148746182	NM_020798	Plate 12	G03	305	11	3.7415	-0.706866
622	Plate 1 Duplex 1	E17	USP1	7398	63053523	NM_001017416	Plate 12	G04	230	17	7.98122	0.794482
623	Plate 1 Duplex 1	E19	USP50	373509	148806875	NM_203494	Plate 12	G05	213	13	6.5	0.26996
624	Plate 1 Duplex 1	H16	UEVLD	55293	103472014	NM_018314	Plate 12	G06	265	8	3.11284	-0.929482
625	Plate 1 Duplex 1	H18	UBE2F	140739	18087856	NM_080678	Plate 12	G07	150	6	4.16667	-0.556307
626	Plate 1 Duplex 1	H20	DCUN1D2	55208	62122951	NM_001014283	Plate 12	G08	119	3	2.58621	-1.11597
627	Plate 1 Duplex 1	I20	UBA3	9039	38045941	NM_003968	Plate 12	G10	151	4	2.72109	-1.06821
628	Plate 1 Duplex 1	J15	HECW2	57520	55741472	NM_020760	Plate 13	B02	205	23	12.6374	2.85766
629	Plate 1 Duplex 1	K15	FBXL15	79176	71061448	NM_024326	Plate 13	B03	320	21	7.02341	0.189362
630	Plate 1 Duplex 1	K17	FBXW10	10517	110815833	NM_031456	Plate 13	B04	253	23	10	1.60413
631	Plate 1 Duplex 1	K19	FBXO42	54455	62955043	NM_018994	Plate 13	B05	306	20	6.99301	0.174911
632	Plate 1 Duplex 1	N16	FBXL16	146330	34222207	NM_153350	Plate 13	B06	240	8	3.44828	-1.50989
633	Plate 1 Duplex 1	N18	FBXO27	126433	34222267	NM_178820	Plate 13	B07	297	9	3.125	-1.66354
634	Plate 1 Duplex 1	N20	FBXO43	286151	117606350	NM_001029860	Plate 13	B08	318	8	2.58065	-1.92227
635	Plate 1 Duplex 1	O15	FBXO38	81545	45505154	NM_030793	Plate 13	B09	233	12	5.42986	-0.568047
636	Plate 1 Duplex 1	O17	LGR6	59352	62912473	NM_001017404	Plate 13	B10	332	22	7.09677	0.224231
637	Plate 1 Duplex 1	J17	UBE2B	7320	32967281	NM_003337	Plate 13	C02	304	24	8.57143	0.925131
638	Plate 1 Duplex 1	K16	FBXO18	84893	30795116	NM_032807	Plate 13	C03	256	22	9.40171	1.31976
639	Plate 1 Duplex 1	L15	FBXO48	554251	67003565	NM_001024680	Plate 13	C04	304	18	6.29371	-0.157465
640	Plate 1 Duplex 1	L17	FBXO30	84085	54112383	NM_032145	Plate 13	C05	322	20	6.62252	-0.00118204
641	Plate 1 Duplex 1	L19	FBXO17	115290	22325386	NM_024907	Plate 13	C06	315	13	4.30464	-1.10287
642	Plate 1 Duplex 1	O16	ASB7	140460	30089993	NM_024708	Plate 13	C08	268	17	6.77291	0.0702988
643	Plate 1 Duplex 1	O18	NEURL2	140825	40807486	NM_080749	Plate 13	C09	231	20	9.47867	1.35634
644	Plate 1 Duplex 1	O20	FBXO32	114907	22547143	NM_148177	Plate 13	C10	362	18	5.23256	-0.661826
645	Plate 1 Duplex 1	J19	UBE2U	148581	22749026	NM_152489	Plate 13	D02	285	22	8.36502	0.827025
646	Plate 1 Duplex 1	K18	FBXO21	23014	53692181	NM_015002	Plate 13	D03	339	25	7.96178	0.635368
647	Plate 1 Duplex 1	L16	FBXL19	54620	157168348	NM_001099784	Plate 13	D05	283	17	6.39098	-0.111232
648	Plate 1 Duplex 1	L18	KDM2B	84678	54112379	NM_001005366	Plate 13	D06	265	16	6.4257	-0.0947272
649	Plate 1 Duplex 1	L20	SKP2	6502	16306593	NM_032637	Plate 13	D07	208	6	2.9703	-1.73707
650	Plate 1 Duplex 1	B22	SENP2	59343	54607090	NM_021627	Plate 13	D08	250	12	5.04202	-0.75239
651	Plate 1 Duplex 1	D22	JOSD1	9929	141801964	NM_014876	Plate 13	D09	260	16	6.55738	-0.0321427
652	Plate 1 Duplex 1	F22	SMURF1	57154	31317289	NM_181349	Plate 13	D10	360	20	5.88235	-0.35298
653	Plate 1 Duplex 1	J16	UBE2J1	51465	37577121	NM_016021	Plate 13	E02	283	19	7.19697	0.271854
654	Plate 1 Duplex 1	K20	FBXO40	51725	156546887	NM_016298	Plate 13	E03	316	14	4.63576	-0.945482
655	Plate 1 Duplex 1	M15	WSB1	26118	58331180	NM_134265	Plate 13	E04	413	26	6.71835	0.0443656
656	Plate 1 Duplex 1	M17	SOCS7	30837	53831996	NM_014598	Plate 13	E05	275	25	10	1.60413
657	Plate 1 Duplex 1	M19	ASB12	142689	22208954	NM_130388	Plate 13	E06	273	13	5	-0.77236
658	Plate 1 Duplex 1	C22	USP28	57646	40217782	NM_020886	Plate 13	E07	310	16	5.44218	-0.562195
659	Plate 1 Duplex 1	E22	USP48	84196	76257391	NM_001032730	Plate 13	E08	282	15	5.61798	-0.478637
660	Plate 1 Duplex 1	G22	BIRC6	57448	153792693	NM_016252	Plate 13	E09	278	19	7.33591	0.337891
661	Plate 1 Duplex 1	J18	UBE2QL1	134111	113416989	XM_940609	Plate 13	F02	350	20	6.06061	-0.268257
662	Plate 1 Duplex 1	M16	FBXL7	23194	21071079	NM_012304	Plate 13	F04	340	23	7.25552	0.299683
663	Plate 1 Duplex 1	M18	KDM2A	22992	16306579	NM_012308	Plate 13	F05	268	23	9.38776	1.31313
664	Plate 1 Duplex 1	M20	WSB2	55884	32484989	NM_018639	Plate 13	F06	251	17	7.26496	0.304169
665	Plate 1 Duplex 1	B21	USP36	57602	122114650	NM_025090	Plate 13	F07	314	15	5.01672	-0.764412
666	Plate 1 Duplex 1	D21	USP40	55230	116063563	NM_018218	Plate 13	F08	292	23	8.55019	0.915035
667	Plate 1 Duplex 1	F21	USP47	55031	71774196	NM_017944	Plate 13	F09	272	15	5.83658	-0.374738
668	Plate 1 Duplex 1	N15	ASB18	401036	157743291	NM_212556	Plate 13	G03	276	20	7.8125	0.564414
669	Plate 1 Duplex 1	N17	FBXL20	84961	14249619	NM_032875	Plate 13	G04	258	10	4.03226	-1.23233
670	Plate 1 Duplex 1	N19	SOCS2	8835	21536304	NM_003877	Plate 13	G05	290	10	3.57143	-1.45136
671	Plate 1 Duplex 1	C21	USP37	57695	32698743	NM_020935	Plate 13	G06	313	27	9.44056	1.33823
672	Plate 1 Duplex 1	E21	OTUD1	220213	253795536	XM_001134465	Plate 13	G07	265	17	6.85484	0.10924
673	Plate 1 Duplex 1	G21	UBE2W	55284	145301542	NM_018299	Plate 13	G08	241	16	7.11111	0.231046
