# Supplementary figures and images for: High-Content RNAi Phenotypic Screening Unveils the Involvement of Human Ubiquitin-Related Enzymes in Late Cytokinesis
Source: MDPI journal article supplement (doi:10.3390/cells11233862), 2022-11-30

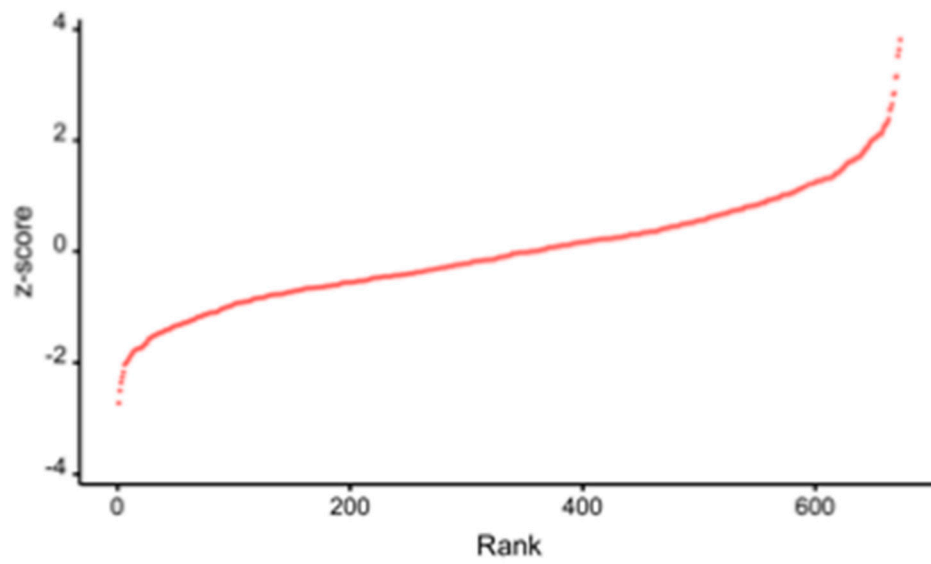

Supplementary Figure S2. Z-score distribution of the screening results ranked by z-score.

Supplement: s1 [file s1]
